# Supplementary material for: Identification of Prognostic and Tumor Microenvironment by Shelterin Complex-Related Signatures in Oral Squamous Cell Carcinoma
Source: Oxid Med Cell Longev. 2022 Jun 15;2022:6849304. doi: 10.1155/2022/6849304 (PMC9217620; doi:10.1155/2022/6849304)
Supplement: Supplementary Materials — Supplementary Figure 1: immune infiltrating cells in high and low risk groups. ∗P < 0.05, ∗∗P < 0.01, and ∗∗∗P < 0.001. Supplementary file 1: 1329 DEGs between SGCluster A and SGCluster B. Supplementary file 2: result of univariate Cox analysis. [file 6849304.f1.zip › Supplementary file. 1.txt]

id	logFC	AveExpr	t	P.Value	adj.P.Val	B
POT1	0.881980644	3.993842179	21.94755436	1.23E-74	2.16E-70	158.991621
TTC26	0.69497111	2.542079801	16.44184284	1.36E-48	1.19E-44	99.67614108
DPY19L4	0.818898644	4.30563587	16.26954144	8.41E-48	4.92E-44	97.87309906
WDHD1	0.951416104	3.949272497	15.93350397	2.89E-46	1.27E-42	94.3726037
IFT81	0.687511365	2.576209932	15.68784893	3.79E-45	1.33E-41	91.82778498
MSH2	0.886870291	5.1035013	15.60304003	9.18E-45	2.69E-41	90.95214497
TMEM67	0.658891875	2.148694302	15.46028948	4.06E-44	1.02E-40	89.48177398
TMEM209	0.69619177	4.162996602	15.39397363	8.08E-44	1.77E-40	88.80023178
ATF2	0.819080813	4.578952943	15.30792174	1.97E-43	3.85E-40	87.9173359
UTP23	0.692442008	4.232481642	15.26153542	3.19E-43	5.60E-40	87.44211269
DDX18	0.687302019	5.910865768	15.13457536	1.18E-42	1.89E-39	86.1439822
NUP155	0.87786344	4.878413454	15.11552191	1.44E-42	2.11E-39	85.9494944
ORC3	0.688117276	5.009657236	15.07434701	2.20E-42	2.98E-39	85.52949877
NUDT21	0.6920421	6.122428131	14.99223501	5.13E-42	6.44E-39	84.69315543
CHRAC1	0.67691674	5.555717625	14.95512633	7.52E-42	8.80E-39	84.3157288
MTBP	0.711785678	2.261913629	14.91070527	1.19E-41	1.27E-38	83.86437627
AGK	0.617530287	3.951902456	14.90747082	1.23E-41	1.27E-38	83.83153088
PRIM2	0.745195007	3.850757387	14.88589683	1.53E-41	1.49E-38	83.61251665
CBX1	0.794300149	6.869251442	14.85439865	2.11E-41	1.95E-38	83.29296376
CENPI	0.80406512	2.866690373	14.76656473	5.20E-41	4.56E-38	82.40320266
CTDSPL2	0.782125085	4.062310782	14.72300836	8.11E-41	6.52E-38	81.96270618
RAD21	0.798221103	7.719691675	14.72235363	8.17E-41	6.52E-38	81.95608851
VKORC1L1	0.63968398	4.80730161	14.6993553	1.03E-40	7.89E-38	81.72370214
SIX4	1.129558564	2.642842886	14.56866233	3.92E-40	2.84E-37	80.40574399
CDCA7L	0.911559407	5.022477032	14.56539672	4.05E-40	2.84E-37	80.3728701
TRIM37	0.694688208	4.342382427	14.53903049	5.29E-40	3.57E-37	80.10755401
DNAL1	0.654123805	2.433890219	14.51316072	6.89E-40	4.48E-37	79.84741474
RAD54B	0.697473243	2.166331638	14.49965922	7.90E-40	4.95E-37	79.71171897
LIN52	0.720716753	3.851892146	14.41073464	1.95E-39	1.14E-36	78.81922517
TAF1A	0.77844788	3.240554509	14.38577889	2.51E-39	1.42E-36	78.56914501
MDC1	0.758423548	4.201132411	14.32975274	4.42E-39	2.43E-36	78.00833765
TCEA1	0.653059089	5.701934525	14.31694879	5.03E-39	2.68E-36	77.880296
NONO	0.642698542	8.148638584	14.29993121	5.98E-39	3.00E-36	77.71018839
MSH6	0.800444377	4.741145685	14.28813795	6.73E-39	3.19E-36	77.59235066
WDR35	0.746726841	2.633728977	14.28392801	7.02E-39	3.25E-36	77.55029462
ARL13B	0.916184015	3.958160371	14.27563011	7.64E-39	3.44E-36	77.46741568
CSPP1	0.659710494	3.228560025	14.26205169	8.76E-39	3.76E-36	77.33183699
LRRCC1	0.996616013	3.315220324	14.26190691	8.77E-39	3.76E-36	77.3303917
RBL1	0.793285984	3.55878066	14.20951078	1.49E-38	6.08E-36	76.80771554
SSRP1	0.620467949	7.211509999	14.20220062	1.60E-38	6.39E-36	76.73485532
KIF14	0.977123048	3.555762503	14.16846748	2.25E-38	8.78E-36	76.39883616
NUBPL	0.607994759	3.348673201	14.1249845	3.49E-38	1.30E-35	75.96618085
AZIN1	0.76201873	6.851142357	14.11777051	3.75E-38	1.37E-35	75.89445471
MCM4	0.889070873	6.297030706	14.1157797	3.82E-38	1.37E-35	75.87466336
RAD1	0.690153324	4.371283216	14.09828832	4.56E-38	1.60E-35	75.70082552
RAD51AP1	1.077513212	4.673858172	14.09324837	4.79E-38	1.65E-35	75.6507525
NSL1	0.659918972	4.058768797	13.97112691	1.63E-37	5.51E-35	74.43973127
TTI1	0.703589947	5.082938312	13.95706639	1.88E-37	6.11E-35	74.30058334
DSCC1	0.843257434	3.746279136	13.92999478	2.46E-37	7.86E-35	74.03283963
KLHL12	0.627274699	5.203173878	13.92222949	2.66E-37	8.34E-35	73.95607998
ZWILCH	0.735891428	4.891628017	13.89398264	3.53E-37	1.09E-34	73.67701388
DROSHA	0.669704658	5.328652046	13.83946296	6.08E-37	1.84E-34	73.13906761
CENPL	0.725944613	3.451113736	13.81857702	7.48E-37	2.17E-34	72.93322587
SNRNP40	0.601143931	5.64929691	13.81765288	7.55E-37	2.17E-34	72.92412109
POFUT1	0.711664718	5.139928724	13.8160149	7.68E-37	2.17E-34	72.90798401
TOP2A	1.091837134	6.344862115	13.7982263	9.17E-37	2.51E-34	72.73278758
CRCP	0.596117156	5.331038225	13.79517354	9.45E-37	2.55E-34	72.70273136
ZFR	0.700730638	5.628682921	13.75144651	1.46E-36	3.88E-34	72.27252822
IPO9	0.628448667	4.730829902	13.74659529	1.53E-36	4.01E-34	72.2248365
DEPDC1	0.893884732	3.852638597	13.73640126	1.70E-36	4.38E-34	72.12464433
GPATCH11	0.640731944	3.56812226	13.71422166	2.11E-36	5.38E-34	71.90676333
PAIP1	0.688957847	6.126146851	13.70846946	2.24E-36	5.61E-34	71.85028175
NCAPH	0.936012606	4.65024797	13.69824023	2.48E-36	6.04E-34	71.74986523
CCDC138	0.652075818	2.358234359	13.6690693	3.31E-36	7.96E-34	71.46368534
MRPL3	0.653941341	7.740645108	13.64594879	4.16E-36	9.87E-34	71.23705298
NCAPD2	0.962093976	6.261080695	13.63737371	4.53E-36	1.06E-33	71.15304114
ZBTB41	0.711926698	3.890479183	13.58469398	7.63E-36	1.72E-33	70.63743875
G2E3	0.703397614	3.580857301	13.58424504	7.66E-36	1.72E-33	70.63304857
C1orf112	0.778406823	3.116961522	13.56474229	9.29E-36	2.07E-33	70.4423929
ALMS1	0.714485415	3.302060321	13.56128858	9.62E-36	2.11E-33	70.40864267
ZFP64	0.634731667	3.870322995	13.54510469	1.13E-35	2.45E-33	70.25054218
ATAD2	1.003340189	5.293421591	13.53228537	1.28E-35	2.74E-33	70.12536992
C18orf54	0.734078072	2.402654162	13.52252758	1.41E-35	2.98E-33	70.03012712
ATP6V1C1	0.612218007	5.58806406	13.48993143	1.94E-35	3.97E-33	69.71218913
ANKRD40	0.639895741	4.719929779	13.48575007	2.03E-35	4.05E-33	69.67142975
WRN	0.777292047	3.594802665	13.48567187	2.03E-35	4.05E-33	69.67066754
R3HDM1	0.596151009	4.292480168	13.48006347	2.14E-35	4.23E-33	69.61600649
ZC3HAV1L	0.822762231	3.333074455	13.47286268	2.30E-35	4.44E-33	69.5458407
ANP32E	0.761605357	6.530318095	13.46446384	2.50E-35	4.76E-33	69.46402219
BRCA1	0.835092821	3.591232827	13.46348402	2.52E-35	4.76E-33	69.45447859
DESI2	0.626252347	5.242882814	13.45675817	2.70E-35	5.04E-33	69.38897652
CERS6	0.90333535	4.628010737	13.44889837	2.91E-35	5.35E-33	69.31244985
ARL6IP6	0.775894099	4.927607536	13.4485211	2.92E-35	5.35E-33	69.30877704
KIF4A	0.945223838	4.936677027	13.44152078	3.13E-35	5.67E-33	69.2406365
IFT52	0.65112085	5.003675419	13.42116773	3.83E-35	6.72E-33	69.04261289
XPO1	0.595477088	6.350339131	13.41214027	4.18E-35	7.22E-33	68.95482439
ACTL6A	0.882435423	6.768821189	13.41188462	4.19E-35	7.22E-33	68.95233861
DNAJC10	0.709715933	4.209741386	13.4063633	4.43E-35	7.55E-33	68.89865971
FANCM	0.6116735	2.427757024	13.40283287	4.58E-35	7.67E-33	68.86434169
FAM161A	0.684704934	1.759378848	13.38410925	5.51E-35	9.13E-33	68.68240485
NCAPG2	0.87704574	4.659824408	13.38102835	5.68E-35	9.32E-33	68.65247899
TBC1D31	0.595423738	2.558709888	13.37025626	6.31E-35	1.03E-32	68.54787049
UXS1	0.703657903	5.046119294	13.36403281	6.71E-35	1.08E-32	68.48745171
HAUS2	0.622267276	4.943542452	13.34408838	8.16E-35	1.30E-32	68.2939129
TRIP13	1.001705518	5.255721981	13.34189711	8.34E-35	1.32E-32	68.27265711
PRKAA1	0.72380965	4.706959899	13.33641356	8.80E-35	1.38E-32	68.21947248
PPIL4	0.637313032	5.358228996	13.30454158	1.20E-34	1.87E-32	67.91054698
TTK	0.886440493	4.608023202	13.29251024	1.35E-34	2.07E-32	67.79401926
RBM12B	0.682975673	3.397412764	13.29131603	1.37E-34	2.07E-32	67.78245561
MPHOSPH9	0.673435875	2.538483383	13.28495386	1.46E-34	2.15E-32	67.72085799
BUB1	0.809628754	3.959682597	13.27809601	1.56E-34	2.26E-32	67.65447652
CDCA8	0.931451669	5.561969907	13.27686165	1.58E-34	2.27E-32	67.64253008
KIF23	0.866834736	4.567403317	13.2743713	1.62E-34	2.31E-32	67.61842936
DCLRE1A	0.663028855	3.421982644	13.22868211	2.53E-34	3.52E-32	67.17663767
RBBP4	0.674943004	5.717826614	13.21619213	2.86E-34	3.92E-32	67.055989
ZNF146	0.681688061	6.485109054	13.20715861	3.12E-34	4.24E-32	66.9687616
EME1	0.760730881	3.107644468	13.19979114	3.35E-34	4.53E-32	66.89764209
C8orf33	0.59832594	5.901666888	13.19314738	3.58E-34	4.79E-32	66.83352459
EXTL2	0.813025933	3.5517837	13.17618981	4.22E-34	5.57E-32	66.6699391
NUP160	0.7863957	4.67101397	13.14085791	5.96E-34	7.63E-32	66.32941788
DHX9	0.616277235	6.937493079	13.13214604	6.48E-34	8.19E-32	66.24552085
HAT1	0.619409117	5.8636381	13.12500078	6.95E-34	8.72E-32	66.17673008
CDC73	0.599580661	5.18881803	13.12383429	7.03E-34	8.75E-32	66.16550137
HS2ST1	0.587238485	4.156754275	13.12163626	7.18E-34	8.88E-32	66.14434437
OTUD6B	0.667271084	4.396513527	13.10276409	8.63E-34	1.04E-31	65.96276018
CPNE2	0.744492019	4.535846078	13.09878866	8.97E-34	1.07E-31	65.92452505
DHX33	0.625835578	4.707415289	13.09155162	9.62E-34	1.14E-31	65.85493444
CDK4	0.683875029	6.921986804	13.08494609	1.03E-33	1.19E-31	65.7914323
EXO1	0.868031533	4.063220218	13.08489617	1.03E-33	1.19E-31	65.79095242
OTUD6B-AS1	0.602634916	3.958984562	13.05972062	1.31E-33	1.50E-31	65.54906741
ZNF496	0.618066002	3.150072792	13.05886487	1.32E-33	1.51E-31	65.54084928
DHX35	0.742126335	3.275788734	13.04202434	1.56E-33	1.75E-31	65.37917513
TMEM39A	0.666842868	4.404797019	13.0161835	2.00E-33	2.20E-31	65.13128873
CENPO	0.667141483	3.324304386	13.0117308	2.09E-33	2.28E-31	65.08859857
NFS1	0.601046646	4.017005586	13.00814542	2.16E-33	2.34E-31	65.05422878
C8orf37	0.681113116	2.344054703	13.00264816	2.28E-33	2.44E-31	65.00154047
SP4	0.685808914	2.61758935	12.99151346	2.54E-33	2.69E-31	64.89485288
SENP1	0.667191285	3.768878635	12.98542767	2.70E-33	2.83E-31	64.83656018
DSG2	1.260216181	6.654949584	12.98375239	2.74E-33	2.86E-31	64.82051575
NDC1	0.666954013	5.39558292	12.97370662	3.02E-33	3.14E-31	64.72432697
PIGK	0.598911553	4.195097332	12.97174688	3.08E-33	3.18E-31	64.70556657
UTP20	0.724920445	3.969913492	12.96374106	3.33E-33	3.40E-31	64.6289416
ODF2	0.627629197	4.804977764	12.96247195	3.37E-33	3.42E-31	64.61679681
CAD	0.697685141	4.968487078	12.95434895	3.64E-33	3.68E-31	64.53907723
ANKMY2	0.677994918	4.653062839	12.94417454	4.02E-33	4.03E-31	64.44176314
COLGALT1	0.641897772	6.704396684	12.94157494	4.12E-33	4.11E-31	64.41690499
SPATS2	0.599796491	4.418328334	12.93817392	4.26E-33	4.23E-31	64.38438696
CCP110	0.652573661	3.137494447	12.93439634	4.42E-33	4.34E-31	64.34827337
RYK	0.695992283	5.29251339	12.93432518	4.42E-33	4.34E-31	64.34759321
AGBL5	0.665179104	4.056125883	12.92020294	5.07E-33	4.89E-31	64.21263047
E2F7	1.005435875	3.253202146	12.8963225	6.38E-33	6.06E-31	63.98457344
TATDN1	0.647720894	4.792353345	12.8828976	7.27E-33	6.86E-31	63.85645608
ACD	0.596264359	5.033530376	12.86912186	8.30E-33	7.79E-31	63.72505802
LIN9	0.672045739	2.91165926	12.86774876	8.41E-33	7.86E-31	63.71196462
SLC25A32	0.641335901	5.536190797	12.86699333	8.47E-33	7.87E-31	63.70476138
PRKDC	0.871728414	6.237100759	12.85927739	9.13E-33	8.39E-31	63.63119979
CENPF	0.954446066	4.678254316	12.84183504	1.08E-32	9.73E-31	63.46498836
ZNF507	0.621465386	3.055265009	12.84072172	1.09E-32	9.78E-31	63.45438309
APEX1	0.592879164	8.239565914	12.83326844	1.17E-32	1.05E-30	63.38339602
PPAT	0.717837419	4.157207642	12.82340615	1.29E-32	1.13E-30	63.28949585
ARMC1	0.587088405	6.254494248	12.80483617	1.54E-32	1.33E-30	63.11278456
ORC6	0.783495596	4.20451878	12.79195688	1.75E-32	1.50E-30	62.9902994
CASP2	0.68477275	4.091915357	12.79056182	1.77E-32	1.51E-30	62.97703563
ARL6IP1	0.627742871	7.894813703	12.77896093	1.98E-32	1.68E-30	62.86676612
CDC6	0.926508824	4.605426803	12.77842624	1.99E-32	1.68E-30	62.86168489
PDIA4	0.67232981	8.02462651	12.76167943	2.34E-32	1.96E-30	62.70259225
C1orf109	0.690789508	4.16901321	12.7421097	2.82E-32	2.35E-30	62.51681254
SPICE1	0.722113537	2.943127555	12.73918145	2.90E-32	2.40E-30	62.48902606
DNA2	0.760611383	2.918050487	12.72038903	3.47E-32	2.84E-30	62.31077847
TFAM	0.639287455	4.894817142	12.71937547	3.51E-32	2.85E-30	62.30116847
C5orf22	0.650889506	4.534114252	12.70796284	3.91E-32	3.14E-30	62.19298664
CDK2	0.735135686	5.023235147	12.70682387	3.95E-32	3.15E-30	62.18219283
FBXO5	0.79358066	4.160967609	12.70143382	4.16E-32	3.29E-30	62.13111885
TRMT61B	0.62794595	4.690008837	12.69914112	4.26E-32	3.35E-30	62.10939739
CEP85	0.754453446	4.177681743	12.69360879	4.49E-32	3.52E-30	62.05699119
ADNP	0.638589727	6.182315204	12.68731689	4.77E-32	3.70E-30	61.99740348
EMC1	0.596780222	4.973212392	12.68094891	5.07E-32	3.89E-30	61.93711029
PSMC3IP	0.760940813	3.510877172	12.66814664	5.73E-32	4.37E-30	61.81594159
NAA40	0.684695404	4.282913039	12.66735604	5.77E-32	4.39E-30	61.80846088
PHF6	0.659410256	4.005488	12.66064298	6.15E-32	4.66E-30	61.74495067
DEK	0.765349068	7.720686536	12.6529722	6.62E-32	4.99E-30	61.67240024
BUB1B	0.910613123	4.812477459	12.6387947	7.59E-32	5.67E-30	61.53836707
TFB2M	0.610529497	4.704928251	12.63803724	7.64E-32	5.68E-30	61.53120819
PARP2	0.618420582	4.750662199	12.63462564	7.89E-32	5.80E-30	61.49896738
C4orf46	0.738379951	3.799627224	12.62225513	8.89E-32	6.47E-30	61.38209803
TAF9B	0.753685208	4.76481108	12.61522508	9.50E-32	6.89E-30	61.31570784
ZNF623	0.620121495	4.3545051	12.59958498	1.10E-31	7.91E-30	61.16807295
TRMT11	0.629745686	4.287969209	12.59539346	1.15E-31	8.16E-30	61.12852263
PTDSS1	0.654526545	6.675039002	12.59343287	1.17E-31	8.25E-30	61.11002528
SLC39A10	0.7725496	4.139629819	12.58390094	1.28E-31	8.96E-30	61.02011565
TBCCD1	0.725960543	4.519367261	12.58069178	1.32E-31	9.17E-30	60.98985311
CEP192	0.730542957	3.614517437	12.57317922	1.42E-31	9.81E-30	60.91902451
NUF2	0.940067265	4.524537839	12.57031804	1.46E-31	1.00E-29	60.89205482
POFUT2	0.652160141	3.444868306	12.56126882	1.59E-31	1.09E-29	60.80677659
NEK2	0.939033769	4.640381065	12.55091856	1.76E-31	1.20E-29	60.70927566
DCAF17	0.595029555	3.274230399	12.52957725	2.15E-31	1.44E-29	60.50836579
DSN1	0.764603148	5.00072979	12.52888454	2.17E-31	1.45E-29	60.50184747
WBP11	0.619976502	5.927054484	12.52503314	2.25E-31	1.49E-29	60.46560929
FANCA	0.689056536	2.816087003	12.52262879	2.30E-31	1.51E-29	60.44298944
TJAP1	0.617012	4.041982236	12.52202329	2.31E-31	1.51E-29	60.43729336
CEP57	0.618105751	4.431378504	12.52142909	2.32E-31	1.52E-29	60.43170364
DBF4	0.719963335	4.460450986	12.51453	2.48E-31	1.61E-29	60.36681324
KLHL42	0.672040236	4.223852261	12.50504077	2.72E-31	1.75E-29	60.27759046
KIF18A	0.849866293	3.650090437	12.49760749	2.92E-31	1.88E-29	60.20772283
GPAM	0.604364085	2.973590734	12.48197814	3.38E-31	2.16E-29	60.06088699
RHNO1	0.706299271	5.424692747	12.47436984	3.64E-31	2.31E-29	59.98944173
DPY19L1	0.783736981	4.050947412	12.46973816	3.80E-31	2.41E-29	59.94595923
TCTN2	0.664166065	3.026893383	12.46442818	4.00E-31	2.52E-29	59.89611885
PHTF2	0.628905195	3.730327987	12.44995093	4.59E-31	2.88E-29	59.76028796
TPX2	0.921790809	6.889077425	12.4466927	4.73E-31	2.96E-29	59.72972924
LZTFL1	0.58767557	2.840735016	12.44213325	4.94E-31	3.08E-29	59.68697322
NLN	0.601282365	3.662715966	12.43933374	5.07E-31	3.14E-29	59.66072501
PFAS	0.685135555	4.067571001	12.41889001	6.16E-31	3.75E-29	59.46913591
PRIM1	0.839014405	4.386565955	12.41392225	6.45E-31	3.92E-29	59.42260481
ICE1	0.727031476	5.262275564	12.38201432	8.73E-31	5.18E-29	59.12396388
PTK2	0.658491607	5.233953513	12.37003013	9.78E-31	5.76E-29	59.01190068
NUP43	0.586816265	4.904695678	12.35904489	1.09E-30	6.34E-29	58.90922782
ATAD5	0.69641119	2.785078765	12.35881799	1.09E-30	6.34E-29	58.90710752
NUDCD1	0.691080853	4.869796454	12.35163043	1.16E-30	6.77E-29	58.83995561
TAF2	0.785768963	5.126905492	12.34390588	1.25E-30	7.26E-29	58.76780922
MCM6	0.807728108	5.766417895	12.33520809	1.36E-30	7.83E-29	58.68660085
BLM	0.751897102	3.155170273	12.33188385	1.40E-30	8.05E-29	58.65557137
KIF15	0.867216674	3.169535147	12.32752713	1.46E-30	8.36E-29	58.61491103
HIBADH	0.652903193	5.197240445	12.32624653	1.48E-30	8.43E-29	58.60296084
CLSPN	0.82899293	2.825421884	12.31766355	1.60E-30	9.12E-29	58.52288374
TTC33	0.685481161	3.480777663	12.31348779	1.67E-30	9.43E-29	58.48393536
CENPA	0.799512062	4.269290974	12.31342839	1.67E-30	9.43E-29	58.48338136
XRCC2	0.723756388	3.221732488	12.31220159	1.69E-30	9.51E-29	58.47194008
DARS2	0.725638827	4.915902257	12.3110325	1.71E-30	9.58E-29	58.46103749
FIGNL1	0.841453407	4.231084687	12.30928359	1.74E-30	9.69E-29	58.44472866
DLGAP5	0.865107258	5.370606388	12.30913044	1.74E-30	9.69E-29	58.44330059
NFYA	0.594513918	4.665063966	12.29997684	1.90E-30	1.05E-28	58.35796246
CDC7	0.868743066	3.891888426	12.25329149	2.94E-30	1.60E-28	57.92323444
TRIQK	0.754664443	3.370724356	12.25283279	2.96E-30	1.60E-28	57.91896734
YEATS4	0.762501153	5.445157693	12.21481433	4.23E-30	2.26E-28	57.56559056
NUCKS1	0.626104364	7.398772512	12.21195899	4.34E-30	2.31E-28	57.53907378
PARPBP	0.675516117	2.902216644	12.21181841	4.35E-30	2.31E-28	57.53776833
NBN	0.671380818	5.481428949	12.19393812	5.14E-30	2.70E-28	57.37179425
KNSTRN	0.721373425	4.96169566	12.18479685	5.60E-30	2.90E-28	57.2869898
FOXM1	1.009602951	5.502471959	12.17942491	5.89E-30	3.03E-28	57.23716932
DHX40	0.682490321	4.947856112	12.17913588	5.91E-30	3.03E-28	57.23448916
CERS2	0.704098233	6.307316171	12.17064458	6.40E-30	3.27E-28	57.15576386
CEP290	0.606044105	2.906250888	12.15853826	7.17E-30	3.65E-28	57.04357279
ANLN	1.002906702	6.069550868	12.14718807	7.98E-30	4.04E-28	56.93844261
SLC25A40	0.710089703	3.744569198	12.13705472	8.77E-30	4.41E-28	56.84462717
UHRF1	0.915951982	4.952764269	12.12059466	1.02E-29	5.09E-28	56.69232707
TUBB	0.591697204	10.19925589	12.11246828	1.10E-29	5.48E-28	56.6171765
DTL	0.932135068	4.704559258	12.1076062	1.16E-29	5.71E-28	56.57222618
HELLS	0.832091276	3.392238354	12.10494157	1.18E-29	5.83E-28	56.54759555
SKP2	0.775895889	5.183759329	12.10034142	1.24E-29	6.05E-28	56.50508052
GANAB	0.629791782	8.48302419	12.08733644	1.40E-29	6.81E-28	56.38493395
TGS1	0.630890161	5.087470634	12.0781747	1.52E-29	7.38E-28	56.30033446
CKAP2L	0.903398974	4.19088391	12.07364971	1.59E-29	7.66E-28	56.25856344
IFT140	0.609217378	2.818757257	12.07018376	1.64E-29	7.89E-28	56.2265742
INTS2	0.607399504	3.759244123	12.04977812	1.98E-29	9.41E-28	56.03833848
ASPM	0.892306883	4.104417132	12.04483363	2.08E-29	9.83E-28	55.9927527
LACTB2	0.679377332	5.0603768	12.04367068	2.10E-29	9.91E-28	55.9820323
CCDC14	0.718868163	3.285351555	12.03497285	2.28E-29	1.07E-27	55.90187116
MTERF3	0.619737918	5.920646747	12.01600868	2.72E-29	1.27E-27	55.72720075
ZNF689	0.585855686	3.28522225	11.99852967	3.20E-29	1.47E-27	55.56634061
MTRR	0.645355358	4.537037815	11.99567747	3.29E-29	1.51E-27	55.54010367
NUP205	0.675247843	5.169018451	11.97545022	3.97E-29	1.80E-27	55.35413271
SPRED2	0.754346764	4.220078459	11.97309178	4.05E-29	1.84E-27	55.33245997
VEZF1	0.696074715	5.368158603	11.97101228	4.13E-29	1.87E-27	55.31335256
USP1	0.702151777	6.193472402	11.97095857	4.13E-29	1.87E-27	55.31285909
MTR	0.673082634	4.109509974	11.96443642	4.39E-29	1.98E-27	55.25294211
GEMIN2	0.615976005	4.125885888	11.96083885	4.54E-29	2.04E-27	55.21989989
CENPN	0.688278922	4.380958212	11.95019109	5.02E-29	2.24E-27	55.12213614
BBS10	0.643846937	4.042477103	11.94788432	5.12E-29	2.28E-27	55.10096248
GINS1	0.806230511	5.076930601	11.94703485	5.16E-29	2.30E-27	55.09316579
MNAT1	0.600196344	4.549833702	11.94433847	5.30E-29	2.35E-27	55.06841972
MSI2	0.691979821	2.985066818	11.94076507	5.47E-29	2.42E-27	55.03562932
CABLES2	0.740564849	3.59156518	11.92936944	6.09E-29	2.66E-27	54.93109588
G3BP2	0.644534077	6.005023915	11.91219718	7.14E-29	3.09E-27	54.77367499
MCM8	0.741400419	3.384388175	11.90455963	7.66E-29	3.31E-27	54.70369991
CCSAP	0.591166187	3.247109464	11.89207417	8.60E-29	3.69E-27	54.5893611
ZNF551	0.613854439	2.645810749	11.88233023	9.41E-29	4.02E-27	54.5001738
CKAP5	0.687837601	6.102712808	11.88064323	9.56E-29	4.08E-27	54.48473655
TMEM230	0.596637823	6.906746191	11.87430679	1.01E-28	4.28E-27	54.42676436
BAZ1B	0.624866455	5.287843791	11.86924553	1.06E-28	4.46E-27	54.38047095
ERCC6L	0.752494902	3.329605325	11.86740418	1.08E-28	4.53E-27	54.36363143
TRUB1	0.612333805	4.12228711	11.86440547	1.11E-28	4.65E-27	54.33621077
TCF3	0.59738842	5.431926649	11.8626385	1.13E-28	4.71E-27	54.32005516
PARP1	0.657923919	6.631008061	11.85708733	1.19E-28	4.89E-27	54.26930854
KNTC1	0.77648129	3.859634005	11.84701938	1.31E-28	5.33E-27	54.17730444
PRPS1	0.593747688	6.040835068	11.8402806	1.39E-28	5.65E-27	54.11574722
SMURF2	0.617193105	4.311944048	11.82729649	1.57E-28	6.34E-27	53.99719453
AIDA	0.650526024	5.077155061	11.81196658	1.80E-28	7.25E-27	53.85731522
KIF18B	0.836793335	4.375042678	11.79409159	2.13E-28	8.50E-27	53.694339
XRN2	0.663921429	6.806326099	11.79397258	2.13E-28	8.50E-27	53.6932543
KIAA0753	0.59530742	3.461438076	11.78732651	2.27E-28	9.00E-27	53.63269343
SLC33A1	0.599308946	4.441158632	11.78039647	2.42E-28	9.55E-27	53.56956482
ATP2C1	0.644652579	6.104115022	11.77989162	2.43E-28	9.57E-27	53.56496677
SENP2	0.681695181	4.75175255	11.7720423	2.61E-28	1.02E-26	53.49349057
ZNF639	0.66734514	4.439342973	11.76184706	2.87E-28	1.12E-26	53.40069158
NCBP2	0.612004154	6.326333717	11.75559469	3.04E-28	1.17E-26	53.34380336
ZKSCAN8	0.662095425	3.160693519	11.75244852	3.13E-28	1.21E-26	53.31518366
ECT2	0.902253696	5.282730123	11.75135791	3.16E-28	1.22E-26	53.30526377
SMC2	0.864185131	5.058188421	11.75026513	3.19E-28	1.22E-26	53.2953246
NF1	0.614128523	3.063970941	11.74338913	3.40E-28	1.30E-26	53.23279711
PLK4	0.727939798	3.695073116	11.73802003	3.57E-28	1.36E-26	53.18398685
RFC3	0.765336116	4.296070536	11.73588679	3.64E-28	1.38E-26	53.16459715
NFXL1	0.597166518	3.641836206	11.73220026	3.77E-28	1.42E-26	53.13109358
ABHD10	0.630131717	4.900139398	11.72215732	4.13E-28	1.55E-26	53.03985193
FAM91A1	0.595646236	5.173827313	11.71860271	4.27E-28	1.59E-26	53.00756815
CCNE2	0.854395817	2.803858938	11.71747969	4.31E-28	1.60E-26	52.99736973
RSRC1	0.688124683	4.54388476	11.71729973	4.32E-28	1.60E-26	52.9957355
CENPE	0.797501297	3.699952959	11.71512525	4.41E-28	1.63E-26	52.97599031
MTHFD1	0.674038989	5.996044856	11.7146168	4.43E-28	1.64E-26	52.97137362
ZFP69B	0.620339648	1.927851859	11.71390695	4.46E-28	1.64E-26	52.96492851
TRPM7	0.623245037	3.495895906	11.68441642	5.84E-28	2.14E-26	52.69735822
STIL	0.782888025	4.138364307	11.68055894	6.05E-28	2.21E-26	52.66238679
UNG	0.651577245	6.485238652	11.67614176	6.30E-28	2.30E-26	52.62234902
LMAN2L	0.608509318	5.239258563	11.67329978	6.47E-28	2.35E-26	52.59659346
TMEM185B	0.65943383	5.684394025	11.66984066	6.68E-28	2.42E-26	52.56524979
CENPBD1	0.64150366	2.997155408	11.65979641	7.32E-28	2.64E-26	52.47426652
GINS4	0.858457815	2.683796485	11.65696784	7.52E-28	2.70E-26	52.44865261
BHLHB9	0.615607731	1.836027883	11.64973957	8.03E-28	2.87E-26	52.38321311
TIMELESS	0.771008568	4.894588864	11.64737521	8.21E-28	2.92E-26	52.36181281
C5orf51	0.609187377	4.570421987	11.64302255	8.54E-28	3.03E-26	52.32242244
LRRC40	0.598563083	4.905742983	11.63191132	9.46E-28	3.33E-26	52.22190627
HEATR1	0.752896363	4.537800296	11.63019285	9.61E-28	3.37E-26	52.20636518
SUV39H2	0.592334407	3.68564077	11.62896963	9.71E-28	3.40E-26	52.19530364
SPAG5	0.817496562	4.74895496	11.62748438	9.85E-28	3.44E-26	52.18187354
SLC25A36	0.714543379	4.666209017	11.62262386	1.03E-27	3.59E-26	52.1379298
MCM2	1.018574959	6.567512097	11.60942754	1.16E-27	4.01E-26	52.01867441
GATAD1	0.604962703	4.530534251	11.60801593	1.18E-27	4.05E-26	52.00592218
CASP8AP2	0.67623844	3.308775209	11.60779888	1.18E-27	4.05E-26	52.00396142
IFT22	0.634387629	3.817220271	11.59640607	1.31E-27	4.47E-26	51.90107372
HSP90AA1	0.604472232	10.21794532	11.59314965	1.35E-27	4.60E-26	51.87167569
NUP107	0.692754172	5.109673107	11.58707053	1.43E-27	4.84E-26	51.81680748
ZNF280C	0.641961778	2.405773294	11.56674361	1.72E-27	5.79E-26	51.63346085
IMPACT	0.683041574	4.984100567	11.55713199	1.87E-27	6.31E-26	51.54682834
AURKA	0.763068508	5.251054067	11.55487821	1.91E-27	6.42E-26	51.5265202
HMGXB4	0.633571493	4.788633954	11.55450481	1.92E-27	6.43E-26	51.5231558
KIF2C	0.823720536	5.520139005	11.55341744	1.94E-27	6.48E-26	51.5133588
ZNF281	0.698483483	4.630676009	11.5464007	2.07E-27	6.90E-26	51.4501519
DDIAS	0.780455308	3.484567893	11.53484622	2.30E-27	7.58E-26	51.3461162
LCA5	0.607320185	1.795645813	11.52865478	2.43E-27	7.96E-26	51.29039325
BRIP1	0.791620467	2.830302416	11.52439579	2.52E-27	8.18E-26	51.25207209
APMAP	0.649232318	7.41781187	11.50644184	2.97E-27	9.58E-26	51.09061619
ADAT1	0.600738985	4.113315252	11.49754934	3.22E-27	1.03E-25	51.01070078
FAM216A	0.700389692	2.897770814	11.49471883	3.31E-27	1.06E-25	50.98527086
C5orf34	0.746319082	2.242091056	11.47883782	3.82E-27	1.21E-25	50.84265822
GOLIM4	0.914706057	5.629446761	11.46373675	4.38E-27	1.37E-25	50.7071536
GMCL1	0.626109395	4.375353745	11.46154012	4.47E-27	1.40E-25	50.68745135
ZNF74	0.618602884	2.850353184	11.45658464	4.68E-27	1.46E-25	50.64301196
ZHX2	0.714874477	4.731175777	11.43884223	5.50E-27	1.70E-25	50.48399288
MCM10	0.761205781	3.574001763	11.43280787	5.81E-27	1.79E-25	50.42994108
KRIT1	0.653544766	4.352252791	11.40343311	7.58E-27	2.29E-25	50.16705482
TMEM237	0.65266399	4.269086308	11.39977804	7.83E-27	2.35E-25	50.1343713
ITCH	0.644842188	5.221956041	11.3911985	8.46E-27	2.52E-25	50.05767685
ARL6	0.592680857	2.576026381	11.38691965	8.80E-27	2.61E-25	50.01943968
RECQL	0.860692565	5.494249161	11.38625438	8.85E-27	2.62E-25	50.01349537
M6PR	0.79741356	6.446419128	11.36041999	1.12E-26	3.28E-25	49.78281424
CLIC3	-1.539551476	6.399832951	-11.35417239	1.18E-26	3.46E-25	49.72707334
BRIX1	0.610709549	5.068791057	11.35112599	1.22E-26	3.55E-25	49.69989989
MCM3	0.743562311	7.086785517	11.34634296	1.27E-26	3.68E-25	49.65724433
ZDHHC4	0.640953317	4.510148141	11.34172868	1.32E-26	3.82E-25	49.61610364
TP53BP1	0.639905598	3.295561145	11.34142762	1.33E-26	3.83E-25	49.61341971
RFWD3	0.646444135	5.039923685	11.33204302	1.44E-26	4.15E-25	49.5297781
HLTF	1.073013587	5.040613429	11.32032711	1.61E-26	4.57E-25	49.4254145
SMC4	0.999777875	5.422711947	11.3173166	1.65E-26	4.68E-25	49.39860736
IQGAP3	0.77445282	3.660302533	11.31671	1.66E-26	4.70E-25	49.39320645
SASS6	0.617753187	3.512849058	11.30632611	1.82E-26	5.14E-25	49.30077761
URB2	0.612576014	3.799626492	11.30534795	1.84E-26	5.17E-25	49.2920733
CHEK1	0.638762143	3.772708242	11.29890999	1.95E-26	5.45E-25	49.23479546
NEDD1	0.691226222	4.897953054	11.29762591	1.97E-26	5.48E-25	49.22337342
DHRS4-AS1	0.724122051	3.747919697	11.29671645	1.99E-26	5.52E-25	49.2152841
PAK2	0.619539382	6.378638062	11.29271435	2.06E-26	5.69E-25	49.17969141
HJURP	0.828580385	4.523058405	11.29134656	2.09E-26	5.75E-25	49.16752864
POLD3	0.634379039	4.15620559	11.28911969	2.13E-26	5.84E-25	49.14772849
TRAM2-AS1	0.602012672	2.357779368	11.28283659	2.25E-26	6.16E-25	49.09187479
AKAP1	0.655519548	5.084068627	11.28096141	2.29E-26	6.24E-25	49.07520881
ORC1	0.805883048	3.842143316	11.27764316	2.36E-26	6.41E-25	49.04572134
PRPS2	0.694648159	6.311047928	11.27608679	2.39E-26	6.48E-25	49.03189241
STAG2	0.655653263	6.24397445	11.27348285	2.45E-26	6.63E-25	49.008758
MIS18BP1	0.696094972	4.049258533	11.26832769	2.57E-26	6.93E-25	48.96296664
CALU	0.808687969	7.264394804	11.2656228	2.63E-26	7.08E-25	48.93894507
MAD2L1	0.784930476	4.604343496	11.25218094	2.97E-26	7.95E-25	48.8196202
GTSE1	0.738693316	4.048310821	11.25044743	3.01E-26	8.06E-25	48.80423766
UBXN2B	0.636176387	4.0967193	11.24506101	3.16E-26	8.43E-25	48.75644942
ZNF550	0.593121492	2.425871169	11.2408128	3.29E-26	8.71E-25	48.71876875
PIBF1	0.679476203	4.171215835	11.2374125	3.39E-26	8.94E-25	48.68861482
DNAJC14	0.667846267	4.422008373	11.23566665	3.44E-26	9.07E-25	48.67313463
ZNF644	0.596107262	4.492098502	11.22906357	3.65E-26	9.60E-25	48.61459895
DAP	0.670752873	6.777979769	11.22866051	3.66E-26	9.62E-25	48.61102657
ZNF318	0.682241265	3.936060006	11.2146382	4.16E-26	1.08E-24	48.48678935
CENPQ	0.699348991	4.161288986	11.21372786	4.19E-26	1.09E-24	48.4787269
SMC6	0.604941563	4.380866129	11.19085302	5.14E-26	1.33E-24	48.27626125
RNMT	0.60398968	4.799159803	11.19052866	5.16E-26	1.33E-24	48.27339206
OSBPL9	0.593635009	5.233944148	11.18860892	5.25E-26	1.35E-24	48.25641168
QSER1	0.677762117	4.763671321	11.1749564	5.93E-26	1.51E-24	48.1357026
TMX1	0.603564106	6.449301703	11.17315407	6.03E-26	1.53E-24	48.11977375
DBR1	0.590070017	4.920335451	11.16417555	6.53E-26	1.65E-24	48.04044464
NDC80	0.818873564	4.914265675	11.158293	6.89E-26	1.74E-24	47.9884902
TMEM216	0.815864803	4.268702053	11.15815361	6.89E-26	1.74E-24	47.98725928
GNA13	0.645248663	5.933942576	11.14886655	7.49E-26	1.88E-24	47.90526963
SOGA1	0.708741684	4.064162673	11.1300898	8.86E-26	2.21E-24	47.73962417
PAICS	0.589122766	6.167829566	11.12889182	8.96E-26	2.23E-24	47.7290614
TOPBP1	0.797282224	5.546825096	11.11311417	1.03E-25	2.55E-24	47.59000975
NCAPD3	0.70673758	4.115288306	11.11286726	1.03E-25	2.55E-24	47.58783459
RFC4	0.883267542	5.668230842	11.10430875	1.12E-25	2.73E-24	47.51245644
DCLRE1B	0.613470385	3.916408915	11.09941665	1.17E-25	2.83E-24	47.46938522
CYSRT1	-1.731704046	5.559068328	-11.08984941	1.27E-25	3.05E-24	47.38518547
SEMA4F	0.670780259	2.91749061	11.08290664	1.35E-25	3.24E-24	47.32411015
SUPT16H	0.602016944	6.41507666	11.077042	1.42E-25	3.40E-24	47.27253675
RFC5	0.7144058	5.10723208	11.07024585	1.51E-25	3.59E-24	47.21279195
MMD	0.634324115	3.888758927	11.06141048	1.63E-25	3.86E-24	47.13515294
MSANTD4	0.614317233	3.13742103	11.05449665	1.74E-25	4.10E-24	47.07442471
CCT5	0.610242336	7.467123482	11.04200696	1.94E-25	4.56E-24	46.96477775
PNN	0.610360254	6.300078557	11.03142872	2.13E-25	5.00E-24	46.87196906
ZNF260	0.681620542	3.857966718	11.02819733	2.20E-25	5.14E-24	46.84362885
MZT1	0.672672393	5.025403973	11.02734196	2.21E-25	5.17E-24	46.83612788
CTPS2	0.616295017	3.428160128	11.02332807	2.29E-25	5.35E-24	46.80093347
CHML	0.699300783	3.128067519	11.02213197	2.32E-25	5.40E-24	46.79044731
SPIDR	0.616722606	4.316177675	11.02157231	2.33E-25	5.42E-24	46.78554104
THNSL1	0.658360686	2.698754739	11.01852948	2.39E-25	5.56E-24	46.75886867
THAP10	0.61603044	2.581181349	11.0145364	2.48E-25	5.74E-24	46.72387336
AP3M2	0.696163671	3.478668281	11.01069405	2.57E-25	5.93E-24	46.69020627
ESCO2	0.648615719	2.28515722	10.99842534	2.86E-25	6.58E-24	46.58275325
WDR5B	0.60080725	3.126719482	10.98890189	3.11E-25	7.11E-24	46.49939346
CCDC88A	0.694318412	3.219215445	10.98627569	3.19E-25	7.25E-24	46.47641361
TUBA1B	0.724792626	8.739954583	10.98114104	3.34E-25	7.58E-24	46.43149379
C2CD3	0.595708597	2.973317916	10.97888855	3.40E-25	7.71E-24	46.41179213
PRPF4	0.603983994	6.206924409	10.97540739	3.51E-25	7.93E-24	46.38134856
CCDC77	0.619899539	3.416023346	10.97396797	3.55E-25	8.02E-24	46.36876214
ELOVL5	0.692986349	5.677633912	10.97145408	3.63E-25	8.18E-24	46.3467829
CEP55	0.811443683	6.009845362	10.96789626	3.75E-25	8.40E-24	46.31568153
PNPT1	0.60274944	5.448629357	10.96178851	3.96E-25	8.82E-24	46.26230367
GOPC	0.600531337	5.183878037	10.95282207	4.29E-25	9.49E-24	46.18397498
TIPIN	0.590342889	4.041098285	10.9382368	4.88E-25	1.08E-23	46.05664365
PHF3	0.628137837	4.601108245	10.93792049	4.89E-25	1.08E-23	46.05388339
MGA	0.614112028	3.480369098	10.9371586	4.92E-25	1.09E-23	46.04723492
HMMR	0.857045558	4.50315535	10.93688096	4.94E-25	1.09E-23	46.04481223
POLE2	0.72270749	3.777135006	10.92603981	5.43E-25	1.19E-23	45.95024075
PIK3R4	0.630487621	4.641037472	10.92266855	5.60E-25	1.22E-23	45.92084343
MED30	0.585655512	4.962193588	10.92091559	5.68E-25	1.24E-23	45.90555983
MGME1	0.620164253	6.222036656	10.91576915	5.95E-25	1.29E-23	45.86069788
GORAB	0.619209984	3.803714636	10.90317882	6.65E-25	1.43E-23	45.75100069
FANCI	0.74445092	4.745440037	10.90308241	6.65E-25	1.43E-23	45.75016096
CDK1	0.749701257	5.659110482	10.89934337	6.88E-25	1.47E-23	45.71759832
DNMT1	0.724124746	5.996610763	10.89854061	6.93E-25	1.48E-23	45.71060811
MTFR2	0.624817012	3.344149075	10.88863755	7.56E-25	1.60E-23	45.62440037
UBE2T	0.852589176	5.870524033	10.88082816	8.10E-25	1.71E-23	45.55645175
STMN1	0.805341897	6.247484343	10.87271817	8.70E-25	1.83E-23	45.4859189
RCN2	0.609101467	5.320915046	10.85025565	1.06E-24	2.20E-23	45.29072764
FAM168B	0.589944064	6.141590415	10.84213382	1.14E-24	2.35E-23	45.22021215
IFT80	0.585749222	3.078723857	10.83960344	1.16E-24	2.40E-23	45.19824931
CDCA5	0.776667475	5.458313872	10.82934494	1.27E-24	2.61E-23	45.10924118
HMGN4	0.63600535	7.194021045	10.82558579	1.32E-24	2.69E-23	45.07663757
AFAP1	0.789609826	3.783922722	10.82272859	1.35E-24	2.74E-23	45.05186132
CCNB1IP1	0.658894344	5.319462581	10.8224941	1.35E-24	2.75E-23	45.04982812
NCAPG	0.703475484	4.907702933	10.81699705	1.42E-24	2.87E-23	45.00217226
ZNF567	0.615375816	2.376551656	10.81224139	1.48E-24	2.98E-23	44.96095561
PRR11	0.685466044	5.664501088	10.81212487	1.48E-24	2.98E-23	44.95994582
TWSG1	0.685439739	5.781117182	10.80722924	1.55E-24	3.11E-23	44.91752787
IFT172	0.624084145	3.012620859	10.80663713	1.56E-24	3.12E-23	44.91239834
TMEM263	0.746636541	5.380213332	10.79536737	1.72E-24	3.43E-23	44.81479977
MYBL1	0.585798511	2.186310865	10.78871434	1.82E-24	3.63E-23	44.75721221
ASTE1	0.604279623	3.538670762	10.78401838	1.90E-24	3.78E-23	44.71657776
LAPTM4B	0.773219243	7.937063999	10.78257212	1.92E-24	3.82E-23	44.70406538
TMPO	0.771068795	5.401507078	10.7786248	1.99E-24	3.95E-23	44.66992013
GMPS	0.630862878	5.446824258	10.77836325	1.99E-24	3.96E-23	44.66765793
KLHL5	0.755541992	4.940279003	10.77564202	2.04E-24	4.05E-23	44.6441234
SPC25	0.737873013	4.309827421	10.77009359	2.14E-24	4.24E-23	44.59614914
TMEM106C	0.592808143	5.935643436	10.76649819	2.21E-24	4.36E-23	44.56506973
BORA	0.757256121	3.753324973	10.74698995	2.62E-24	5.10E-23	44.39654698
NNT-AS1	0.726388155	2.732613402	10.74572753	2.65E-24	5.15E-23	44.38564799
DOCK7	0.587064294	3.75876044	10.73812984	2.83E-24	5.47E-23	44.32007036
CNFN	-2.169812392	9.211856636	-10.73312697	2.96E-24	5.68E-23	44.27690479
NARS2	0.632460829	4.711124743	10.72770468	3.11E-24	5.94E-23	44.23013438
ANKIB1	0.655278525	4.972755261	10.72077529	3.30E-24	6.28E-23	44.17038541
MEST	1.059978133	4.88151811	10.71743375	3.40E-24	6.43E-23	44.14158132
POLA1	0.696189145	4.099532469	10.71213569	3.56E-24	6.73E-23	44.09592336
SPIN1	0.617578122	6.37144291	10.69815006	4.02E-24	7.55E-23	43.97546359
RAD51	0.639710419	4.151216469	10.68360759	4.56E-24	8.44E-23	43.8503104
SHCBP1	0.662228224	4.572974618	10.67568059	4.89E-24	9.02E-23	43.78213443
DEPDC1B	0.752102515	3.866603853	10.66545584	5.35E-24	9.80E-23	43.69424274
EIF4A2	0.703923402	6.000314534	10.66138736	5.54E-24	1.01E-22	43.65928471
ZNF384	0.676287756	3.941390732	10.64607547	6.33E-24	1.15E-22	43.52779237
GINS2	0.75786401	4.269180377	10.64355799	6.47E-24	1.17E-22	43.50618444
DCBLD2	0.960370262	4.331359835	10.62952866	7.31E-24	1.31E-22	43.38582644
CCDC127	0.595457081	3.417197436	10.62407108	7.66E-24	1.37E-22	43.33903224
RICTOR	0.591293124	4.00224466	10.60785967	8.82E-24	1.56E-22	43.20012076
FLVCR1	0.684963182	3.281339125	10.60778817	8.83E-24	1.56E-22	43.19950841
NUSAP1	0.855692062	6.367673612	10.60134242	9.34E-24	1.65E-22	43.1443132
RACGAP1	0.646338178	6.256241541	10.60101088	9.36E-24	1.65E-22	43.14147473
CCNA2	0.771775257	5.83396726	10.58685017	1.06E-23	1.85E-22	43.02029157
TULP3	0.61264282	4.969388856	10.58587661	1.07E-23	1.86E-22	43.01196385
OCRL	0.588715896	4.544453517	10.58362843	1.09E-23	1.89E-22	42.99273489
BBX	0.676887904	4.625354459	10.57551027	1.17E-23	2.02E-22	42.92332063
ARHGAP11A	0.698601165	3.83477288	10.56794043	1.25E-23	2.14E-22	42.85862466
RAVER1	0.800061526	4.169673714	10.54139448	1.57E-23	2.67E-22	42.63197651
PYCR1	1.04876018	5.571409587	10.53825888	1.61E-23	2.74E-22	42.6052284
TAF6	0.66555337	5.307022412	10.5364246	1.64E-23	2.78E-22	42.58958343
AUNIP	0.623344114	3.214551764	10.53191966	1.70E-23	2.89E-22	42.55116714
SP3	0.607811193	4.760580697	10.5300822	1.73E-23	2.92E-22	42.53550096
LSG1	0.586906305	5.887287757	10.53000986	1.73E-23	2.92E-22	42.53488422
PATZ1	0.701626828	3.482510516	10.51507342	1.97E-23	3.31E-22	42.40760007
RMI1	0.727195675	4.535428799	10.51120498	2.04E-23	3.41E-22	42.37465268
TAF1	0.622676659	3.691580404	10.50614058	2.13E-23	3.56E-22	42.33153092
HPS3	0.671999668	3.899584565	10.50596632	2.13E-23	3.56E-22	42.33004736
ALCAM	1.140954395	5.314180572	10.50172664	2.21E-23	3.68E-22	42.29395818
DCAKD	0.631723273	4.623236919	10.48642557	2.52E-23	4.16E-22	42.1637877
PRC1	0.752286981	5.868385668	10.48601235	2.53E-23	4.17E-22	42.16027399
NEIL3	0.748076089	2.868193963	10.46898982	2.93E-23	4.78E-22	42.01560215
RAD54L	0.707360353	3.873800148	10.46808742	2.96E-23	4.81E-22	42.00793689
ASPH	0.70102043	4.864404917	10.46662259	2.99E-23	4.86E-22	41.99549512
RB1CC1	0.61509436	5.947735714	10.46152982	3.13E-23	5.07E-22	41.95224734
TTF2	0.65500402	3.493265583	10.45706051	3.25E-23	5.25E-22	41.91430482
KBTBD4	0.59375409	3.134895655	10.455428	3.30E-23	5.31E-22	41.9004481
BCL9	0.629134492	3.398475119	10.45404802	3.34E-23	5.36E-22	41.88873591
UBE2C	0.759231011	7.448917028	10.44432529	3.63E-23	5.81E-22	41.80624434
PLK1	0.753317019	5.184017383	10.44283669	3.67E-23	5.88E-22	41.79361881
ZWINT	0.718104846	6.413913246	10.43199116	4.03E-23	6.43E-22	41.70166627
NNT	0.787155903	4.328231314	10.42963998	4.11E-23	6.54E-22	41.68174007
TMCO3	0.619547128	3.94560977	10.42499858	4.28E-23	6.78E-22	41.64241257
CENPK	0.806113511	3.510843396	10.41834163	4.53E-23	7.16E-22	41.58602616
BAG2	0.752927305	2.666984602	10.40352644	5.15E-23	8.08E-22	41.46061857
MIS18A	0.636523508	4.845072706	10.39918557	5.34E-23	8.38E-22	41.42389535
CHD6	0.641650677	3.484307036	10.39881192	5.36E-23	8.40E-22	41.42073477
RSF1	0.613132407	3.863557384	10.39323417	5.62E-23	8.76E-22	41.37356306
LRRC58	0.614264829	5.17701596	10.38654935	5.96E-23	9.22E-22	41.3170498
CCNB2	0.662346176	5.217640947	10.38638466	5.96E-23	9.22E-22	41.31565777
P4HA1	0.761349084	5.785788809	10.37660462	6.48E-23	1.00E-21	41.23301988
CCDC34	0.709172434	3.726047791	10.36324945	7.27E-23	1.11E-21	41.12025319
TIA1	0.602299426	4.916975174	10.35207328	8.00E-23	1.22E-21	41.02595604
SPDL1	0.624329788	4.101002237	10.35020073	8.13E-23	1.24E-21	41.01016303
C9orf64	0.61161125	5.097719119	10.34559918	8.46E-23	1.28E-21	40.97136148
TXNDC16	0.7586027	3.112253009	10.3429347	8.65E-23	1.31E-21	40.94889884
CMSS1	0.598176466	5.267953273	10.34273954	8.67E-23	1.31E-21	40.9472537
SMARCA1	1.072342454	4.38184512	10.34065915	8.82E-23	1.33E-21	40.92971792
CHAF1B	0.705087226	3.804647893	10.33666033	9.13E-23	1.37E-21	40.89601788
TFRC	0.952470513	6.452536851	10.31985803	1.05E-22	1.57E-21	40.75450716
WDR76	0.777147294	3.753036474	10.31839124	1.07E-22	1.59E-21	40.74216067
MANEA	0.638835447	3.514539594	10.29225103	1.33E-22	1.96E-21	40.52231688
SBSN	-2.348618383	8.941553809	-10.28660766	1.40E-22	2.05E-21	40.47490184
TMEM38B	0.70601861	3.761832474	10.28223888	1.45E-22	2.13E-21	40.43820719
MCM7	0.747256458	7.311329319	10.28100644	1.47E-22	2.15E-21	40.42785736
MLF1	1.332687696	4.393998455	10.28010556	1.48E-22	2.16E-21	40.42029248
KIF11	0.711884905	5.427465698	10.27666026	1.52E-22	2.22E-21	40.39136528
DNMT3A	0.610001203	3.073596475	10.27389989	1.56E-22	2.27E-21	40.36819332
LRP6	0.686168981	3.404747632	10.26898109	1.63E-22	2.35E-21	40.32691222
HSPA13	0.697955314	5.014174579	10.2610437	1.74E-22	2.51E-21	40.26032437
RNASEH2A	0.725690633	6.270924294	10.2548668	1.83E-22	2.63E-21	40.20852825
CBLB	0.616087929	3.726016754	10.23870747	2.10E-22	3.00E-21	40.07311962
ARHGEF10	0.678603201	2.923182921	10.23693127	2.13E-22	3.04E-21	40.05824412
CDCA3	0.696602174	4.163853359	10.23057328	2.25E-22	3.20E-21	40.00501022
TSPAN6	0.710922753	5.3144038	10.21093325	2.66E-22	3.75E-21	39.84070332
AP2B1	0.658734047	6.34660045	10.2081642	2.73E-22	3.83E-21	39.81755398
SLC39A14	0.869463634	5.018465067	10.20726539	2.75E-22	3.85E-21	39.81004078
DNAJC13	0.592263305	4.567449598	10.20366966	2.83E-22	3.96E-21	39.77998814
TMEM97	0.81727445	4.858991513	10.2027598	2.85E-22	3.98E-21	39.77238471
PUS7	0.615100109	5.109799779	10.19995297	2.92E-22	4.07E-21	39.74893164
EXO5	0.60554828	3.190934642	10.19985194	2.92E-22	4.07E-21	39.74808757
LINC00526	0.636001596	1.913890406	10.1956154	3.03E-22	4.21E-21	39.71269638
DIAPH3	0.604713517	2.971473454	10.18532518	3.31E-22	4.58E-21	39.62677343
B3GNT9	0.674436329	4.594751975	10.18378032	3.35E-22	4.63E-21	39.61387878
CNTRL	0.675407023	3.575544533	10.18366073	3.35E-22	4.63E-21	39.61288066
POLQ	0.756293367	2.81871629	10.18363594	3.36E-22	4.63E-21	39.61267376
EDC4	0.601436357	4.59967323	10.18324755	3.37E-22	4.65E-21	39.60943213
YEATS2	0.63962883	4.72537245	10.16572298	3.90E-22	5.34E-21	39.4632508
SPTBN1	0.657682974	5.203911644	10.15302277	4.35E-22	5.91E-21	39.3574135
HMGN2	0.587386649	8.81014794	10.14975413	4.47E-22	6.06E-21	39.3301881
ZNF232	0.594244942	3.568689341	10.14779697	4.54E-22	6.14E-21	39.31388916
LPCAT3	0.743843604	4.174556441	10.14292927	4.73E-22	6.37E-21	39.27336028
GPR161	0.745563799	3.221377921	10.14200543	4.77E-22	6.42E-21	39.26566975
TYMS	0.809302852	5.494197124	10.14027339	4.84E-22	6.50E-21	39.2512526
FAM168A	0.671877827	4.82794681	10.1257463	5.47E-22	7.31E-21	39.13039439
FNBP1L	0.691147775	4.786357865	10.11394601	6.05E-22	8.02E-21	39.03230447
MGAT2	0.637606022	3.361790571	10.11260801	6.11E-22	8.10E-21	39.02118706
CBX5	0.745098978	4.725478811	10.10679603	6.42E-22	8.46E-21	38.97290638
HSF2BP	0.587200948	1.627704487	10.08874324	7.48E-22	9.75E-21	38.82305523
MTMR12	0.585114023	4.748868791	10.07161645	8.63E-22	1.12E-20	38.68105157
FUT4	0.592954291	2.447176311	10.06559539	9.08E-22	1.18E-20	38.63116642
CLCN2	0.619751478	2.662010336	10.05913699	9.59E-22	1.24E-20	38.57767946
ZNF251	0.598043963	3.344618459	10.04879673	1.05E-21	1.34E-20	38.49209045
DZIP1	0.686976709	3.011333897	10.0462984	1.07E-21	1.37E-20	38.47141973
BCKDHB	0.606976218	2.925763151	10.02974527	1.23E-21	1.56E-20	38.33454704
SSX2IP	0.596530943	3.48125053	10.02653835	1.26E-21	1.60E-20	38.30804708
SDE2	0.588583504	4.905842769	10.01280432	1.41E-21	1.79E-20	38.19462045
SMC3	0.625915436	6.066871654	10.01217909	1.42E-21	1.80E-20	38.1894592
BIRC5	0.722772647	5.858958863	10.01129874	1.43E-21	1.81E-20	38.18219237
CD46	0.626331033	6.388734407	10.01117479	1.43E-21	1.81E-20	38.18116923
FEN1	0.660792051	6.448963137	10.0072936	1.48E-21	1.86E-20	38.1491371
GNA12	0.631065288	5.905200741	9.998547098	1.59E-21	1.99E-20	38.07698059
KIF20B	0.635134082	4.051556241	9.97739386	1.90E-21	2.36E-20	37.90264254
CBFA2T2	0.633986316	3.669320182	9.975772043	1.93E-21	2.39E-20	37.88928606
ZNF827	0.626843444	3.2128199	9.942095633	2.55E-21	3.11E-20	37.61226657
SPINK7	-2.271468958	3.868125677	-9.93579394	2.69E-21	3.26E-20	37.56049784
KLHL23	0.854935785	2.239583357	9.929342187	2.84E-21	3.43E-20	37.50751878
CKS1B	0.673036201	6.516401624	9.913301218	3.25E-21	3.89E-20	37.37589554
ROCK1	0.603740034	4.192269444	9.899243414	3.65E-21	4.35E-20	37.26066062
CENPH	0.744617781	4.506475666	9.893711927	3.82E-21	4.54E-20	37.21534744
NT5DC3	0.587346963	2.318913403	9.889352736	3.96E-21	4.70E-20	37.17964936
CEP72	0.615231423	2.794292166	9.885422211	4.09E-21	4.85E-20	37.1474706
OIP5	0.786940872	4.129630981	9.884584523	4.12E-21	4.87E-20	37.14061365
CSTB	-0.983686982	9.799158406	-9.877419915	4.37E-21	5.15E-20	37.08198291
S100A9	-1.524729653	13.73158607	-9.87573345	4.44E-21	5.22E-20	37.06818602
SLC29A1	0.678931543	5.201211687	9.849714051	5.51E-21	6.45E-20	36.8555205
CENPJ	0.612160787	3.015910921	9.844043839	5.77E-21	6.73E-20	36.80922532
FUT8	0.758466883	3.781701089	9.841328454	5.90E-21	6.88E-20	36.78706148
FKBP14	0.672934188	4.458659831	9.830811411	6.44E-21	7.44E-20	36.70125637
C17orf100	0.630655595	2.654454335	9.822048692	6.92E-21	7.97E-20	36.62981082
PDZK1IP1	-1.495686021	7.696423616	-9.821384048	6.96E-21	8.01E-20	36.62439347
SULT2B1	-1.441010295	5.937099405	-9.812189116	7.51E-21	8.63E-20	36.54947292
ESF1	0.598016622	5.065562796	9.811271532	7.57E-21	8.69E-20	36.54199898
RAB23	0.711668062	3.581323746	9.803394458	8.08E-21	9.24E-20	36.47785754
FANCD2	0.588656421	3.061380291	9.791925206	8.88E-21	1.01E-19	36.38452715
FAM3C	0.615040735	5.323727958	9.791708436	8.90E-21	1.01E-19	36.3827639
KIF24	0.607970411	2.298134742	9.789197215	9.08E-21	1.03E-19	36.36233901
BRCA2	0.606705571	2.498027824	9.786515515	9.29E-21	1.06E-19	36.3405314
PGBD1	0.625905128	2.463273412	9.78373837	9.50E-21	1.08E-19	36.31795183
LRP12	0.821443354	3.718250972	9.781017242	9.72E-21	1.10E-19	36.29583186
DIS3L	0.626453137	4.240222547	9.779747763	9.82E-21	1.11E-19	36.2855137
CPD	0.624116502	4.833397456	9.778343337	9.93E-21	1.12E-19	36.27409977
ERVMER34-1	0.910225195	3.237052593	9.776591603	1.01E-20	1.13E-19	36.25986474
USP11	0.697525387	5.598516855	9.769746391	1.07E-20	1.20E-19	36.20425522
MEX3A	0.813814426	2.387181533	9.767576745	1.09E-20	1.22E-19	36.18663476
RBBP8	0.735958626	5.838620628	9.756341173	1.19E-20	1.33E-19	36.09542859
USP37	0.644439332	2.732155643	9.755953266	1.19E-20	1.33E-19	36.09228096
CDKN3	0.743561688	5.420306563	9.75579779	1.20E-20	1.34E-19	36.0910194
ZNF559	0.602383527	3.292748506	9.75355544	1.22E-20	1.36E-19	36.07282592
RCBTB1	0.596176587	3.742959896	9.735435607	1.41E-20	1.56E-19	35.92591214
PIK3CA	0.588081787	4.119536285	9.724964086	1.54E-20	1.70E-19	35.84109361
PSRC1	0.680273892	3.884841213	9.710859467	1.73E-20	1.89E-19	35.72694413
KIF20A	0.798990979	5.305396993	9.696539719	1.95E-20	2.12E-19	35.6111675
NCEH1	0.898456966	4.480579172	9.687790998	2.09E-20	2.27E-19	35.54048975
SCRN1	0.70635886	6.314314286	9.686030166	2.12E-20	2.30E-19	35.52626981
SLURP1	-2.407777628	5.726863127	-9.682367224	2.19E-20	2.36E-19	35.49669461
TRIM45	0.591577694	2.039544	9.680156251	2.23E-20	2.40E-19	35.47884649
SH3BP4	0.59729295	5.096198012	9.665187054	2.52E-20	2.70E-19	35.35807964
TEAD2	0.721429149	4.754814612	9.662998499	2.56E-20	2.75E-19	35.34043362
TRAM2	0.710531463	4.810295337	9.659046108	2.65E-20	2.83E-19	35.30857286
SOX4	0.853645229	5.51498985	9.639274179	3.11E-20	3.32E-19	35.14932078
PRKCI	0.589341146	5.651777431	9.630773985	3.34E-20	3.54E-19	35.08092416
IKBIP	0.587279547	4.57639882	9.609773795	3.96E-20	4.17E-19	34.91212168
HIP1	0.682284506	3.771602472	9.596005391	4.43E-20	4.64E-19	34.80158485
ATP2B1	0.64755238	4.942637926	9.592294838	4.57E-20	4.78E-19	34.77181381
KRT16	-1.756951969	12.36532596	-9.59153147	4.59E-20	4.81E-19	34.76569002
ZBED8	0.610088404	2.595399163	9.587843432	4.73E-20	4.95E-19	34.73610897
PM20D2	0.714458851	4.061409338	9.587299221	4.76E-20	4.97E-19	34.73174461
LCE3D	-2.426703871	7.087026538	-9.580229568	5.04E-20	5.25E-19	34.67506406
AGPAT5	0.60145337	4.614474263	9.579865965	5.05E-20	5.26E-19	34.67214967
CRCT1	-2.20321812	6.378065691	-9.575998983	5.21E-20	5.43E-19	34.64115916
SKA1	0.67422427	3.969805339	9.57291836	5.35E-20	5.56E-19	34.61647673
DONSON	0.588300269	4.503831449	9.564310383	5.73E-20	5.94E-19	34.54753691
MAGEE1	0.595213434	2.209214223	9.559169268	5.98E-20	6.17E-19	34.50638271
TRIO	0.68900722	4.291309105	9.552521517	6.31E-20	6.48E-19	34.45319034
TRIM59	0.651432845	3.371258664	9.548228422	6.53E-20	6.69E-19	34.41885228
PRR5L	0.744722674	2.864170362	9.531958305	7.46E-20	7.58E-19	34.2888122
UBXN7	0.619724427	5.040468643	9.529857385	7.59E-20	7.69E-19	34.27203147
IQCB1	0.727770207	4.710123516	9.519229407	8.27E-20	8.35E-19	34.18718103
PNMA1	0.61884434	6.059721754	9.508886151	8.99E-20	9.03E-19	34.1046658
PRMT6	0.733007073	4.356639431	9.506807453	9.14E-20	9.16E-19	34.08809001
LRIG3	0.737119515	5.299191478	9.503415932	9.40E-20	9.40E-19	34.06105091
CHKA	0.661254388	3.267330873	9.498837344	9.75E-20	9.72E-19	34.02455831
TROAP	0.689722946	4.484502351	9.49538638	1.00E-19	9.98E-19	33.99706114
TCF12	0.590013951	4.45499491	9.480520421	1.13E-19	1.12E-18	33.8786878
PLXNA1	0.630379101	5.860776346	9.47124014	1.22E-19	1.20E-18	33.804856
MYBL2	0.741832366	6.43258624	9.466407667	1.27E-19	1.25E-18	33.76642958
NR2C2AP	0.592359396	5.247823233	9.465511144	1.28E-19	1.26E-18	33.75930216
TCF19	0.74398264	5.214559237	9.438298981	1.59E-19	1.55E-18	33.54318428
TCF7L1	0.805119234	4.111365591	9.422113705	1.81E-19	1.76E-18	33.4148443
INCENP	0.618610145	4.337336135	9.412751248	1.95E-19	1.89E-18	33.34067456
E2F5	0.594009858	2.108665081	9.402760279	2.12E-19	2.04E-18	33.26158176
FNDC3B	0.678048111	4.492162129	9.401733876	2.13E-19	2.05E-18	33.25345958
MIB1	0.58597155	4.998277193	9.394403667	2.26E-19	2.18E-18	33.19547169
TGIF2	0.689758611	4.702252228	9.382537703	2.49E-19	2.38E-18	33.10166843
ZNF367	0.795788726	3.943944729	9.381180659	2.52E-19	2.40E-18	33.09094589
PBK	0.808433362	4.990703362	9.375526228	2.63E-19	2.51E-18	33.04627953
CHAF1A	0.644214593	4.757641722	9.369072895	2.77E-19	2.63E-18	32.99532509
CMTM4	0.597038026	3.908251717	9.364049145	2.89E-19	2.73E-18	32.95567519
DCK	0.615904609	5.375724838	9.359372602	3.00E-19	2.83E-18	32.91877883
NADK2	0.608022742	4.404162961	9.340908669	3.48E-19	3.25E-18	32.77322918
MSL2	0.592092768	5.004257549	9.294813285	5.03E-19	4.64E-18	32.41073323
MKI67	0.735467507	5.602477642	9.294003147	5.06E-19	4.66E-18	32.40437341
FGD6	0.657433867	4.050681886	9.287931755	5.31E-19	4.89E-18	32.35672348
DYNC1LI2	0.652084575	5.357929497	9.287411087	5.33E-19	4.90E-18	32.35263815
B4GALT5	0.637120681	6.132624331	9.286848547	5.36E-19	4.92E-18	32.34822445
ARL2BP	0.637656764	4.334387305	9.284314319	5.46E-19	5.02E-18	32.32834317
RAI14	0.879679198	5.684388408	9.257556316	6.76E-19	6.11E-18	32.11865444
SFR1	0.589159054	4.483351862	9.256107196	6.84E-19	6.18E-18	32.10731047
SLPI	-1.373008896	10.82564849	-9.246965179	7.36E-19	6.61E-18	32.03577371
BAG4	0.647711444	4.537600937	9.239845142	7.78E-19	6.98E-18	31.98009322
CDCA7	0.868371574	4.766371386	9.23841841	7.87E-19	7.05E-18	31.96893942
CLIC4	0.627961713	7.385766225	9.237246735	7.95E-19	7.10E-18	31.95978048
AADAT	0.685203618	1.91597223	9.228505429	8.52E-19	7.57E-18	31.89147565
LYPD5	-1.142105985	4.378002142	-9.22735934	8.60E-19	7.63E-18	31.88252343
SDR9C7	-1.612965875	4.206475541	-9.219691687	9.14E-19	8.08E-18	31.82265057
NINL	0.779772075	3.261998248	9.212271386	9.69E-19	8.54E-18	31.76474232
HOXA10	0.782451927	2.148775225	9.207191945	1.01E-18	8.87E-18	31.72512103
IGF1R	0.659966199	5.115110019	9.207141363	1.01E-18	8.87E-18	31.72472655
CREB3L4	0.785669662	3.465514385	9.200893914	1.06E-18	9.28E-18	31.67601558
SCCPDH	0.841128491	4.433017836	9.186128701	1.19E-18	1.04E-17	31.56098424
CHST14	0.696318692	4.454153235	9.177734767	1.27E-18	1.10E-17	31.49564737
TGM1	-1.707495253	7.131182975	-9.169673955	1.36E-18	1.17E-17	31.43294294
SLC45A4	0.699335662	3.368793083	9.164511112	1.41E-18	1.22E-17	31.39280191
FOXRED2	0.857592736	4.081038207	9.163073207	1.43E-18	1.23E-17	31.38162504
TMEM14A	0.694235101	6.999991238	9.16067194	1.46E-18	1.25E-17	31.3629627
B3GALNT1	0.802726201	3.199581424	9.156947376	1.50E-18	1.29E-17	31.33402265
PHC3	0.591617302	3.432184751	9.155072235	1.52E-18	1.30E-17	31.31945584
KIFC1	0.646728317	5.559748529	9.152164715	1.56E-18	1.33E-17	31.29687327
C10orf99	-1.855821932	7.756968609	-9.149118063	1.60E-18	1.36E-17	31.27321548
KLHL13	0.761940367	2.974020842	9.14754343	1.62E-18	1.38E-17	31.26099034
CABYR	0.767112192	2.00290159	9.146116126	1.64E-18	1.40E-17	31.24991033
GMNN	0.606708189	5.654153309	9.14596921	1.64E-18	1.40E-17	31.2487699
CDCA2	0.68378784	3.884634954	9.136411046	1.77E-18	1.50E-17	31.17460301
ASF1B	0.760007598	5.313583456	9.131367742	1.84E-18	1.56E-17	31.13549133
ZNF468	0.760245249	3.497857135	9.11653845	2.06E-18	1.74E-17	31.0205758
ZNF239	0.651476203	1.504602453	9.097280978	2.40E-18	2.01E-17	30.87154196
LINC01214	-1.030556489	1.705735724	-9.097057173	2.41E-18	2.02E-17	30.86981124
DDAH1	0.708890141	2.517078001	9.093923221	2.47E-18	2.06E-17	30.84557902
LYNX1	-1.313516747	4.866717666	-9.084307418	2.66E-18	2.22E-17	30.77126489
MXRA7	0.598277266	4.789316761	9.080615051	2.74E-18	2.28E-17	30.74274382
TPST1	0.790087238	4.992052908	9.079424805	2.76E-18	2.30E-17	30.73355171
PLAG1	0.802463383	2.038315323	9.076934926	2.82E-18	2.34E-17	30.71432546
STEAP1	0.822626773	5.523349887	9.071328847	2.95E-18	2.43E-17	30.67105034
CDC45	0.693464283	4.85144654	9.06827414	3.02E-18	2.49E-17	30.64747803
HMGB3	0.635886811	6.092918466	9.065740204	3.08E-18	2.53E-17	30.62792863
CMBL	0.81614658	4.293778756	9.056274144	3.31E-18	2.72E-17	30.5549319
CDC25C	0.612980029	2.830293205	9.051985214	3.43E-18	2.81E-17	30.52187596
BARD1	0.605978022	3.37810397	9.044814575	3.63E-18	2.96E-17	30.4666347
PTPN14	0.588502973	4.196190423	9.040067026	3.76E-18	3.06E-17	30.43007755
TSPAN13	0.764686029	6.793094259	9.038987229	3.79E-18	3.08E-17	30.42176478
PGAP1	0.598485755	3.057990737	9.034363515	3.93E-18	3.19E-17	30.3861773
SCD5	0.761693144	4.476258482	9.028298539	4.13E-18	3.33E-17	30.3395164
ERLIN2	0.585593415	4.347089998	9.027724457	4.14E-18	3.35E-17	30.33510085
STAG1	0.660274319	4.343191693	9.019045362	4.43E-18	3.57E-17	30.26836995
NRIP3	0.846722681	2.809176134	9.017440572	4.49E-18	3.61E-17	30.25603621
ATP13A3	0.663990683	5.69290525	9.011976289	4.69E-18	3.76E-17	30.21405172
PCNA	0.597029959	8.727201208	9.00007659	5.14E-18	4.11E-17	30.12268372
FZD6	0.734883322	6.977549199	8.996405418	5.29E-18	4.22E-17	30.09451315
DMKN	-1.466855665	6.79599832	-8.992100598	5.47E-18	4.36E-17	30.06149073
NUAK1	0.902737567	4.508930291	8.99117153	5.51E-18	4.39E-17	30.0543653
AURKB	0.717506297	5.413485278	8.98319615	5.87E-18	4.66E-17	29.99322013
CDT1	0.689994651	4.891094501	8.976711823	6.17E-18	4.88E-17	29.94353498
ZNF275	0.630186019	3.366385173	8.972340874	6.38E-18	5.04E-17	29.9100577
DDHD2	0.60093942	3.945604234	8.969463339	6.53E-18	5.14E-17	29.88802488
LAMC1	0.687975807	6.891389016	8.966997937	6.66E-18	5.24E-17	29.8691517
IGF2BP3	1.056448248	2.910542618	8.952961642	7.42E-18	5.82E-17	29.76177146
FAM83D	0.750592925	6.199974555	8.942833223	8.03E-18	6.27E-17	29.68436181
ZBTB12	0.60651075	2.581710715	8.938940557	8.28E-18	6.45E-17	29.65462754
SIX1	0.727672945	2.683895353	8.933059419	8.66E-18	6.74E-17	29.6097218
LINC00667	0.706044926	3.328089089	8.930143204	8.86E-18	6.89E-17	29.58746273
PKD2	0.61832031	4.35226487	8.922996186	9.37E-18	7.26E-17	29.53293251
MBOAT1	0.822081571	3.677863607	8.917658839	9.76E-18	7.56E-17	29.49223008
PITPNA-AS1	0.641340578	4.380716757	8.914068662	1.00E-17	7.76E-17	29.46486132
DHFR	0.696746702	4.004641526	8.907035507	1.06E-17	8.17E-17	29.41126882
FANCL	0.585293302	4.945470849	8.894217303	1.17E-17	8.98E-17	29.31367235
ECE1	0.69560986	6.214458143	8.873846319	1.37E-17	1.04E-16	29.15877737
PEG10	1.285414008	2.135622366	8.872362513	1.39E-17	1.06E-16	29.14750491
TSPY26P	0.64397509	1.730396498	8.86623808	1.45E-17	1.11E-16	29.100992
PGM2L1	0.736753467	3.036159645	8.853298668	1.61E-17	1.22E-16	29.00279767
ADAM17	0.725551068	5.297486002	8.851789314	1.63E-17	1.23E-16	28.99135023
LYPD3	-1.064801026	9.304464229	-8.827262532	1.96E-17	1.48E-16	28.80552815
LIG1	0.609073413	4.684003461	8.823458798	2.02E-17	1.52E-16	28.77674324
RECQL4	0.676187502	4.685143027	8.806827382	2.30E-17	1.71E-16	28.65098946
IVD	0.750138166	3.651299612	8.786462022	2.69E-17	1.98E-16	28.49723596
S100A8	-1.438250727	11.74215566	-8.784448782	2.73E-17	2.01E-16	28.48205047
TAF4B	0.620055431	3.167465442	8.782835227	2.76E-17	2.04E-16	28.46988154
LARP6	0.719838639	3.078831017	8.771470683	3.01E-17	2.21E-16	28.38421954
ZC2HC1A	0.660416222	2.809258536	8.769169046	3.07E-17	2.25E-16	28.36688037
RASSF8	0.648320259	2.871652762	8.765254503	3.16E-17	2.31E-16	28.3373981
ASAP2	0.741333823	4.352897365	8.753758005	3.45E-17	2.51E-16	28.25086769
MCM5	0.628688588	5.864031368	8.737399496	3.91E-17	2.83E-16	28.1278845
TMEM44	0.670894132	3.801491481	8.735440799	3.97E-17	2.87E-16	28.11317022
ENO2	1.014903812	4.407746933	8.732084486	4.07E-17	2.94E-16	28.08796222
TMEM40	-0.795247065	5.624272006	-8.729726757	4.15E-17	2.99E-16	28.07025842
METRNL	-0.598064606	6.747308879	-8.727947155	4.20E-17	3.02E-16	28.05689797
PRSS27	-1.313018752	3.488619973	-8.71499756	4.64E-17	3.32E-16	27.95973791
UGDH	0.736519612	6.164051446	8.696587245	5.34E-17	3.80E-16	27.82178703
MYZAP	-0.660341345	2.032708472	-8.694818947	5.41E-17	3.84E-16	27.80854812
NETO2	0.647810196	4.553378688	8.691940821	5.53E-17	3.92E-16	27.78700433
DENND5A	0.608466703	4.818429196	8.679401549	6.09E-17	4.29E-16	27.69320412
PRTFDC1	0.804800238	3.724778506	8.666351877	6.72E-17	4.71E-16	27.59569071
ITPRIPL2	0.67042718	4.98443995	8.664258473	6.83E-17	4.78E-16	27.58005775
DYNC2H1	0.597759884	1.931454212	8.657839099	7.17E-17	5.01E-16	27.53213685
STEAP2	0.67940429	2.963667738	8.651620847	7.52E-17	5.23E-16	27.48574208
LRP4	0.680770376	2.878508947	8.647348113	7.77E-17	5.40E-16	27.45387705
ENDOU	-1.323972666	2.705546617	-8.640445305	8.18E-17	5.67E-16	27.40242186
PTPRK	0.607439001	5.70988465	8.628835308	8.94E-17	6.17E-16	27.31594595
TMEM64	0.588141485	4.301826661	8.628157696	8.98E-17	6.20E-16	27.31090146
SEC24D	0.617205786	4.210695803	8.62575444	9.15E-17	6.30E-16	27.29301269
NEDD9	0.733524194	3.561551416	8.623880359	9.28E-17	6.39E-16	27.27906541
KCNQ5	0.618617971	1.689582451	8.619480846	9.59E-17	6.60E-16	27.24633207
ZNF532	0.603278944	4.692472635	8.617011652	9.77E-17	6.71E-16	27.22796609
TK1	0.676082658	7.706705241	8.612781615	1.01E-16	6.92E-16	27.19651183
ETV5	0.755850214	3.529534537	8.611939259	1.02E-16	6.96E-16	27.19024948
LMNB1	0.727925225	5.804746066	8.607831874	1.05E-16	7.17E-16	27.15972027
PXYLP1	0.779507895	2.729057381	8.595046098	1.15E-16	7.85E-16	27.06475501
SGCB	0.615823146	4.599259793	8.592421262	1.18E-16	8.00E-16	27.04527207
FARP1	0.621276685	2.243049675	8.590095515	1.20E-16	8.13E-16	27.02801279
KRT78	-1.668543615	4.247758106	-8.581885143	1.27E-16	8.60E-16	26.96711133
CCNB1	0.625937499	6.896816114	8.576742739	1.33E-16	8.93E-16	26.92898868
WFDC12	-1.964888383	4.198306526	-8.557297096	1.53E-16	1.03E-15	26.78498241
EPCAM	1.286709368	5.959017805	8.552641292	1.59E-16	1.06E-15	26.75053914
MYO10	0.651227284	4.944715552	8.552296581	1.59E-16	1.06E-15	26.74798954
PSD3	0.726771899	3.2713959	8.530633836	1.88E-16	1.24E-15	26.58791659
ARMCX2	0.975188169	3.562836654	8.504514859	2.28E-16	1.50E-15	26.39531322
WEE1	0.598957119	4.682535484	8.49974549	2.36E-16	1.56E-15	26.3601906
NT5DC2	0.591302904	4.892722906	8.490698559	2.53E-16	1.66E-15	26.29360712
TMEM79	-0.858503705	6.755406652	-8.478545512	2.77E-16	1.81E-15	26.20424582
RRM2	0.63517959	6.617013848	8.475628087	2.83E-16	1.85E-15	26.1828081
KIF3C	0.652254356	3.486651423	8.45951785	3.20E-16	2.07E-15	26.06452579
PON2	0.646488199	5.418447552	8.456908013	3.26E-16	2.11E-15	26.0453799
EVC2	0.585505136	2.048166315	8.44556432	3.55E-16	2.28E-15	25.96221292
KRTDAP	-2.399325762	9.114789881	-8.433672033	3.87E-16	2.48E-15	25.87511279
THAP9-AS1	0.586001232	4.946314229	8.433037762	3.89E-16	2.49E-15	25.8704699
NRSN2	0.631553457	4.761893674	8.432454277	3.91E-16	2.50E-15	25.86619898
KDELR3	0.801710616	5.03364115	8.411599271	4.57E-16	2.90E-15	25.7136916
ABHD11	0.603873961	4.288552789	8.408678206	4.67E-16	2.95E-15	25.69235299
ALDH1B1	0.764723912	4.282446389	8.393893311	5.21E-16	3.28E-15	25.5844328
PLOD2	0.872625312	5.709436075	8.383703691	5.62E-16	3.52E-15	25.51013744
ADORA2B	0.674452528	5.036937752	8.380855046	5.74E-16	3.59E-15	25.4893792
DEFB1	-1.520084364	6.754760098	-8.375699777	5.96E-16	3.72E-15	25.45182583
SNAPC1	0.606865636	5.239470965	8.365018535	6.45E-16	4.02E-15	25.37407352
FRK	0.640397471	2.964633483	8.363273155	6.54E-16	4.07E-15	25.36137535
KRT1	-2.713026755	7.008553716	-8.344647762	7.51E-16	4.63E-15	25.22599316
TEAD1	0.612132779	4.613874829	8.3257991	8.63E-16	5.27E-15	25.08921772
DZIP1L	0.655996236	2.471306171	8.322511502	8.84E-16	5.39E-15	25.06538493
DNM1	0.807118386	3.054154249	8.304359701	1.01E-15	6.12E-15	24.93392392
RAET1E	-1.038872968	3.381707393	-8.289495774	1.13E-15	6.79E-15	24.82643487
ITGAV	0.794970694	7.403468048	8.281872867	1.19E-15	7.16E-15	24.77136555
S100A7	-2.041835466	10.91601151	-8.276065396	1.24E-15	7.46E-15	24.7294368
ABHD2	0.655208529	5.204865847	8.268266531	1.32E-15	7.88E-15	24.67316533
MEX3B	0.585329128	1.88356068	8.259873906	1.40E-15	8.35E-15	24.6126542
USP13	0.659434036	3.259610271	8.252453294	1.48E-15	8.80E-15	24.55918979
GJC1	0.681099322	2.730113103	8.250120801	1.51E-15	8.95E-15	24.54239198
SOX13	0.658311517	3.599311029	8.249830922	1.51E-15	8.97E-15	24.54030462
DHRS1	-0.594577493	5.723659992	-8.246127741	1.55E-15	9.21E-15	24.51364364
KRT6B	-1.501901294	11.77884556	-8.233580224	1.70E-15	1.01E-14	24.42337499
RAB15	0.68578417	3.393927672	8.230941314	1.73E-15	1.02E-14	24.40440346
CDK14	0.739955272	3.243022174	8.218858572	1.89E-15	1.11E-14	24.31759728
ICAM5	0.589228146	1.805578479	8.210020268	2.02E-15	1.18E-14	24.25416101
RHOBTB3	0.78200266	3.491432536	8.188332944	2.37E-15	1.38E-14	24.0987201
IRS2	0.712497552	3.799473273	8.187888611	2.37E-15	1.38E-14	24.09553866
TGM5	-0.939544563	2.884582979	-8.171081405	2.68E-15	1.56E-14	23.97529387
NXPE3	0.585678845	3.223571211	8.153038319	3.06E-15	1.77E-14	23.84641516
ITGB1	0.773823209	7.043991421	8.15070153	3.11E-15	1.80E-14	23.82973964
CEP70	0.635711278	3.649477171	8.137469409	3.43E-15	1.97E-14	23.73538246
ANKH	0.638757139	4.449002017	8.136348038	3.46E-15	1.98E-14	23.7273914
ANKRD10-IT1	0.635475015	3.405827911	8.135378045	3.48E-15	2.00E-14	23.72047975
ITGB8	0.688028326	4.105641517	8.127076846	3.70E-15	2.11E-14	23.66135542
RMI2	0.719581138	4.870579381	8.115431432	4.02E-15	2.29E-14	23.57848949
IVL	-1.556537725	8.203967881	-8.110647502	4.16E-15	2.37E-14	23.54447435
SLC15A2	0.709538769	2.833589813	8.107133214	4.27E-15	2.42E-14	23.51949643
UCHL1	1.336823654	3.69713865	8.103523387	4.38E-15	2.48E-14	23.49384803
MNS1	0.63514003	2.232444898	8.101639517	4.44E-15	2.51E-14	23.48046628
ARMCX6	0.739743814	3.527908178	8.099192351	4.52E-15	2.55E-14	23.46308678
FAM111B	0.734753719	3.880581669	8.096458787	4.61E-15	2.60E-14	23.44367803
CLDN17	-1.244662187	2.009049879	-8.078505525	5.25E-15	2.94E-14	23.31633077
SLC35G1	0.587366666	1.829554998	8.075311905	5.38E-15	3.01E-14	23.29370011
FGFR2	0.702899298	3.857654329	8.071184363	5.54E-15	3.10E-14	23.26446157
PAFAH1B3	0.605455326	6.101585836	8.049472036	6.48E-15	3.59E-14	23.11084408
ZNF300	0.662017187	2.328732013	8.049401315	6.48E-15	3.59E-14	23.11034423
LOXL1-AS1	0.585496	2.148586039	8.038143963	7.03E-15	3.88E-14	23.03082176
OPN3	0.653981295	3.825510117	8.035884385	7.14E-15	3.94E-14	23.01487023
LGALSL	-0.830187245	5.716386004	-8.02351261	7.81E-15	4.29E-14	22.92759216
FADS2	0.910875815	3.413150891	8.021878331	7.90E-15	4.34E-14	22.91607063
CSTA	-1.087862116	10.4849153	-8.017927426	8.13E-15	4.45E-14	22.8882245
ITGA2	0.771801276	6.111409775	8.015214316	8.29E-15	4.54E-14	22.86910847
SFN	-0.707348277	12.86914233	-8.012398552	8.46E-15	4.63E-14	22.84927439
SPINK5	-1.535453965	6.43528402	-8.005191012	8.91E-15	4.86E-14	22.79852916
POMK	0.647618607	2.258553296	8.004046025	8.98E-15	4.89E-14	22.79047101
ACAP2	0.586170415	4.772699276	7.985034952	1.03E-14	5.58E-14	22.65680442
GDAP1	0.624893155	3.407136487	7.97293059	1.12E-14	6.05E-14	22.57182568
ASNS	0.619033967	4.469370438	7.971891941	1.13E-14	6.09E-14	22.56453844
SGCE	0.939040228	3.744943317	7.968574791	1.16E-14	6.23E-14	22.54126994
MLLT11	0.928235104	4.17680575	7.967488452	1.17E-14	6.27E-14	22.53365131
ARHGEF17	0.589078385	3.746712579	7.956497792	1.26E-14	6.77E-14	22.45661731
RASSF9	0.942438757	2.686191124	7.946515299	1.36E-14	7.26E-14	22.38672031
ARMCX3	0.795065891	4.840001228	7.936601911	1.46E-14	7.77E-14	22.31737387
SPRR1B	-1.698604386	11.63482071	-7.928647717	1.54E-14	8.20E-14	22.26178055
AKT3	0.661557263	3.035186738	7.886166887	2.08E-14	1.10E-13	21.96560076
RHPN2	0.681405326	3.02192368	7.885494419	2.09E-14	1.10E-13	21.96092211
EPS8L1	-0.778890707	4.871195074	-7.874958857	2.26E-14	1.18E-13	21.88766191
GTF2I	0.655272723	4.250290061	7.871435487	2.31E-14	1.21E-13	21.86317863
NUDT11	0.995123836	2.989326443	7.870076769	2.33E-14	1.22E-13	21.8537394
ARHGEF40	0.650327646	3.437202313	7.863148842	2.45E-14	1.28E-13	21.80562952
FZD7	0.982631353	4.550829602	7.847344911	2.74E-14	1.43E-13	21.69600415
RCOR2	0.69234091	2.034534571	7.829434171	3.11E-14	1.61E-13	21.57197087
PLOD3	0.609802591	5.909709895	7.828760511	3.13E-14	1.62E-13	21.56731
MND1	0.602306851	3.544909625	7.826325253	3.18E-14	1.64E-13	21.5504637
SPRR2B	-2.068676042	6.887627659	-7.826026591	3.19E-14	1.65E-13	21.54839794
MAGED1	0.721046761	6.728158031	7.813365684	3.49E-14	1.79E-13	21.46088203
TUBB2A	-0.757396003	7.688717927	-7.793609548	4.01E-14	2.05E-13	21.32454119
GDPD3	-0.930232125	3.670375039	-7.784459814	4.27E-14	2.18E-13	21.26148786
ALOX12B	-1.511068366	3.994139096	-7.772337336	4.65E-14	2.36E-13	21.1780371
S100A12	-1.523007177	6.595321968	-7.767502284	4.81E-14	2.44E-13	21.14478094
CD109	0.627452778	5.617757441	7.737256287	5.95E-14	2.99E-13	20.93711002
ZBTB10	0.614290409	2.159559726	7.731444265	6.20E-14	3.10E-13	20.89727654
STEAP3	0.592599493	5.278025701	7.7312353	6.21E-14	3.11E-13	20.89584481
ADD3	0.681402101	5.806261962	7.726981962	6.39E-14	3.20E-13	20.86670937
EVC	0.621179005	3.393610077	7.70981362	7.21E-14	3.58E-13	20.74923298
ACSL4	0.599384682	5.205560437	7.708492623	7.27E-14	3.61E-13	20.74020235
PSPH	0.607730087	4.645075627	7.698193547	7.82E-14	3.87E-13	20.66983695
E2F1	0.640209409	4.51791756	7.698138316	7.82E-14	3.87E-13	20.6694598
PSIP1	0.652525787	4.508186609	7.694186011	8.04E-14	3.97E-13	20.64247649
KLHL24	0.668427512	4.609397903	7.683873086	8.64E-14	4.26E-13	20.5721187
ARHGEF19	0.626777402	5.061047467	7.682256265	8.73E-14	4.30E-13	20.56109495
GGT7	0.746169602	3.366299641	7.65911822	1.03E-13	5.02E-13	20.40353485
TFDP2	0.607741707	3.835406288	7.65852621	1.03E-13	5.04E-13	20.3995084
SPRR2G	-2.230165118	7.546014212	-7.654909076	1.06E-13	5.16E-13	20.37491238
CTF1	0.665577799	2.574137684	7.637718078	1.19E-13	5.78E-13	20.2581403
GLI2	0.834359932	2.108599269	7.632911704	1.23E-13	5.97E-13	20.22552918
USP2	-0.761594749	2.755703285	-7.62609362	1.29E-13	6.25E-13	20.17929627
FAM229B	0.592506413	2.594635915	7.624903623	1.30E-13	6.30E-13	20.17123031
CKS2	0.592078187	8.016444456	7.62186904	1.33E-13	6.42E-13	20.15066598
TXNRD1	0.727466046	5.31910949	7.615104012	1.39E-13	6.71E-13	20.1048448
SPRR1A	-1.786323903	11.16027766	-7.609912112	1.44E-13	6.94E-13	20.06970046
AQP3	-1.260304005	9.12930806	-7.605426724	1.49E-13	7.15E-13	20.0393537
BPIFC	-1.052373214	2.135693708	-7.598595774	1.56E-13	7.48E-13	19.99316458
CACHD1	0.592986325	2.946249291	7.596283987	1.58E-13	7.60E-13	19.97754026
FHOD3	0.857362747	3.022172943	7.590837963	1.65E-13	7.88E-13	19.94074782
IL36RN	-1.443112092	5.641756293	-7.589634348	1.66E-13	7.94E-13	19.93261919
PTPRS	0.726271836	4.045713089	7.586663819	1.69E-13	8.10E-13	19.91256203
DTX4	0.633319141	4.216680292	7.566135873	1.95E-13	9.28E-13	19.77412515
NPTXR	0.759204427	1.99536413	7.56246515	2.00E-13	9.50E-13	19.74940156
PDGFA	0.590252269	4.30495337	7.562197609	2.00E-13	9.51E-13	19.74759995
SORL1	0.7790278	4.404077593	7.556834163	2.08E-13	9.86E-13	19.71149326
VSIG10L	-1.134605934	4.53193743	-7.551931622	2.15E-13	1.02E-12	19.67850705
B4GALNT1	0.639602379	2.134098384	7.544875578	2.26E-13	1.07E-12	19.63106083
TGM3	-2.236475996	5.074492616	-7.54394663	2.27E-13	1.07E-12	19.62481701
CDSN	-1.280596374	2.712765043	-7.52844225	2.53E-13	1.19E-12	19.52069553
HOPX	-0.980083967	4.645669669	-7.522995343	2.62E-13	1.23E-12	19.48415631
DPYSL3	0.948562581	5.0409677	7.508301374	2.90E-13	1.36E-12	19.38568965
ESM1	0.658540553	2.987205502	7.503250899	3.00E-13	1.40E-12	19.35188073
SEMA5A	0.78914309	2.990991721	7.500609884	3.06E-13	1.42E-12	19.33420839
CNN3	0.616469146	7.109026487	7.486639891	3.36E-13	1.56E-12	19.24081009
ANKRD22	-0.828949804	5.518355377	-7.485763742	3.38E-13	1.57E-12	19.23495706
ADAM9	0.586890592	6.04239915	7.485015191	3.40E-13	1.57E-12	19.22995688
MECOM	0.743005075	2.482663923	7.479113673	3.54E-13	1.63E-12	19.19054964
CD320	0.588991054	5.137852758	7.476273413	3.61E-13	1.67E-12	19.17159264
C1orf68	-0.924792183	2.014791989	-7.46461114	3.91E-13	1.80E-12	19.09381391
FKBP7	0.60799023	3.101007273	7.46380009	3.93E-13	1.81E-12	19.08840838
JPH1	0.716350282	2.929951878	7.463685441	3.93E-13	1.81E-12	19.0876443
ISYNA1	0.842957292	3.989578424	7.398946576	6.10E-13	2.75E-12	18.65767899
EPS8	0.73867279	4.07646592	7.393782231	6.32E-13	2.84E-12	18.62350806
EVPL	-0.757862634	6.550539999	-7.381367855	6.87E-13	3.08E-12	18.54144355
DSG1	-1.935788804	6.217425004	-7.380914358	6.89E-13	3.09E-12	18.53844781
RDH12	-1.294580559	3.252596101	-7.367859712	7.53E-13	3.36E-12	18.45227357
KLK12	-1.574337141	4.546673972	-7.359812932	7.95E-13	3.54E-12	18.39921704
LDHB	0.586130911	8.871092427	7.313629836	1.08E-12	4.76E-12	18.09560371
CRNN	-2.274179779	4.406003689	-7.300065831	1.19E-12	5.20E-12	18.0067226
CENPV	0.690133613	2.424320007	7.29583767	1.22E-12	5.34E-12	17.97904365
DSC2	-0.920004685	7.500786172	-7.289871202	1.27E-12	5.54E-12	17.94000701
KRT8	1.436265451	6.55768712	7.254670692	1.61E-12	6.95E-12	17.71022285
SLC29A2	0.64171741	3.124301145	7.248280326	1.68E-12	7.24E-12	17.66860313
S1PR3	0.639731101	2.825258259	7.241423223	1.76E-12	7.57E-12	17.62397637
SDK1	0.702222104	2.986316262	7.215975389	2.08E-12	8.88E-12	17.45865599
FERMT2	0.701227451	3.665557831	7.206796563	2.21E-12	9.41E-12	17.39914119
LRIG1	0.670247133	3.421833571	7.204361636	2.25E-12	9.55E-12	17.38336354
GPX8	0.617932364	4.981235655	7.201388871	2.29E-12	9.72E-12	17.36410668
LY6G6C	-1.354377951	4.813641902	-7.195267765	2.39E-12	1.01E-11	17.32447577
MRAP2	0.938256547	2.150280804	7.19468671	2.39E-12	1.01E-11	17.32071516
LINC01139	0.921148041	2.082612876	7.186187664	2.53E-12	1.07E-11	17.26573697
OSMR	0.595175938	5.914898517	7.178569886	2.66E-12	1.12E-11	17.216504
BCAT1	0.828469409	3.385815154	7.176939426	2.69E-12	1.13E-11	17.20597196
FABP5	-1.043761422	10.26015565	-7.175326889	2.72E-12	1.15E-11	17.1955576
ZNF488	0.629289686	2.123004702	7.165710021	2.90E-12	1.22E-11	17.1334875
MYLK	0.665354964	3.483669731	7.163908436	2.94E-12	1.23E-11	17.12186701
HEY1	0.862050542	3.992357963	7.157627944	3.06E-12	1.28E-11	17.08137535
HOXB3	0.587333315	1.737292661	7.153246426	3.15E-12	1.32E-11	17.05314378
MATN3	0.658547147	2.102945846	7.14286046	3.37E-12	1.41E-11	16.98627931
COL9A2	0.827980998	2.828768524	7.136003138	3.53E-12	1.47E-11	16.94217517
SPINK6	-1.720117491	3.639675543	-7.130693958	3.65E-12	1.52E-11	16.90805172
COL4A5	0.689351111	4.705450519	7.130310111	3.66E-12	1.52E-11	16.90558543
PLAC1	0.782828916	1.981059813	7.121496152	3.88E-12	1.61E-11	16.84898371
CYP4F22	-1.194589921	2.849762564	-7.119756238	3.93E-12	1.62E-11	16.83781697
KLK7	-1.609771926	6.352639306	-7.102646808	4.39E-12	1.81E-11	16.72812668
GCLM	0.778520812	5.028806387	7.098324325	4.52E-12	1.86E-11	16.70044864
SLC26A2	0.621434509	4.002451045	7.095884862	4.59E-12	1.89E-11	16.68483411
EVA1A	0.919170416	3.278607955	7.091863151	4.71E-12	1.94E-11	16.65910142
CTNNAL1	0.752418658	5.880675826	7.082659642	5.01E-12	2.05E-11	16.60025781
CDR2L	0.5982228	4.649490455	7.06230293	5.72E-12	2.33E-11	16.47032528
RAB25	-0.773966371	7.829894372	-7.058901016	5.85E-12	2.38E-11	16.4486412
ARMCX1	0.736386222	4.107040604	7.055219623	5.99E-12	2.44E-11	16.42518527
CALML3	-0.866697044	8.253039905	-7.045558956	6.38E-12	2.59E-11	16.36367977
SLC6A14	-1.207516226	3.977489227	-7.024938027	7.29E-12	2.94E-11	16.23262408
PI3	-1.699779834	11.50224081	-7.018503681	7.60E-12	3.06E-11	16.19179479
SPRY2	0.639150519	4.340231991	7.008479149	8.12E-12	3.25E-11	16.12824459
KRT2	-1.248558387	1.849904759	-7.004225048	8.34E-12	3.34E-11	16.10129822
IL1RN	-0.880126384	7.528014629	-7.001063543	8.52E-12	3.41E-11	16.08128123
LOXL4	0.92802949	2.439275723	6.97731413	9.93E-12	3.95E-11	15.93114799
GLTP	-0.638193442	8.292496337	-6.961910928	1.10E-11	4.34E-11	15.83399842
HMGA2	0.864327719	2.60071963	6.960264556	1.11E-11	4.39E-11	15.82362495
SCEL	-1.190189808	4.975639777	-6.958334757	1.12E-11	4.44E-11	15.81146822
KITLG	0.630711621	4.232789473	6.954136767	1.15E-11	4.55E-11	15.78503259
SLC39A2	-0.942208096	3.738482664	-6.947605966	1.20E-11	4.74E-11	15.74393267
PLEKHG4B	0.625323363	1.839311687	6.935758941	1.30E-11	5.09E-11	15.66945708
TRIB2	0.598279628	4.997663931	6.926453556	1.38E-11	5.39E-11	15.61103228
TMPRSS11D	-1.368417762	6.066087046	-6.91773829	1.46E-11	5.68E-11	15.55637084
ANTXR1	0.679233904	5.104208422	6.865337874	2.04E-11	7.83E-11	15.22890962
RHCG	-1.626413661	7.385828959	-6.86305136	2.07E-11	7.93E-11	15.21466725
LBH	0.641837573	5.631039862	6.847029483	2.29E-11	8.76E-11	15.11497871
HPDL	0.752925925	2.163497049	6.845082917	2.32E-11	8.86E-11	15.10288018
TNS3	0.615139479	4.431642077	6.842890778	2.35E-11	8.97E-11	15.08925872
BNIPL	-0.868592381	4.160265192	-6.842438253	2.36E-11	8.99E-11	15.08644728
SCARA3	0.738308647	3.8576463	6.841853335	2.37E-11	9.02E-11	15.08281353
GPX7	0.768200213	4.011683783	6.841504646	2.37E-11	9.04E-11	15.08064746
CCDC8	0.966599664	3.398794561	6.837905143	2.43E-11	9.24E-11	15.05829247
CDA	-1.181648269	6.23657998	-6.837269083	2.44E-11	9.27E-11	15.05434318
CDK6	0.671635919	5.000223617	6.825456804	2.63E-11	9.96E-11	14.98105575
TMEM184A	-0.611673643	4.09176701	-6.816991352	2.77E-11	1.05E-10	14.92859738
SPNS2	-0.749802016	4.004058776	-6.806813265	2.96E-11	1.11E-10	14.86559725
BVES	0.591676336	2.142874443	6.79369213	3.22E-11	1.21E-10	14.7844948
RASAL1	-0.614117945	3.270070518	-6.79336142	3.22E-11	1.21E-10	14.78245233
CRISPLD1	0.802892659	2.875779133	6.791612708	3.26E-11	1.22E-10	14.77165363
TMPRSS13	-0.699338721	4.071839825	-6.788485168	3.32E-11	1.25E-10	14.75234607
KRT10	-1.325270738	8.613875987	-6.784713287	3.40E-11	1.27E-10	14.72907049
C8orf88	0.731160465	2.148033406	6.779246342	3.52E-11	1.32E-10	14.69535394
KIAA1549L	0.664387503	2.175393999	6.775432111	3.61E-11	1.35E-10	14.67184355
STC2	0.702218261	3.395105345	6.771774103	3.69E-11	1.38E-10	14.64930635
VEGFA	0.593788187	5.271249267	6.749701478	4.25E-11	1.57E-10	14.51352911
ACAT2	0.642312494	5.174156469	6.748255126	4.28E-11	1.59E-10	14.50464483
B4GALT4	0.600788508	4.658930538	6.738286392	4.56E-11	1.69E-10	14.44345432
PPFIA1	0.740209077	5.188939985	6.734467644	4.67E-11	1.73E-10	14.42003375
FBXO32	0.727175512	4.849700843	6.710659259	5.43E-11	1.99E-10	14.27426372
CHST10	0.587638189	2.186433187	6.703934943	5.66E-11	2.07E-10	14.23317068
SERPINH1	0.623001025	7.952285268	6.651051419	7.87E-11	2.84E-10	13.91118585
NAP1L2	0.700486125	2.271198723	6.651002963	7.88E-11	2.84E-10	13.91089179
KRT14	-1.253954348	13.77131331	-6.648096215	8.02E-11	2.89E-10	13.89325542
PCDH19	0.598278746	1.247582585	6.641326533	8.37E-11	3.01E-10	13.85220597
LTB4R	-0.622078008	5.865004163	-6.621496591	9.46E-11	3.39E-10	13.73216311
MAP1B	0.692557751	3.85759276	6.619697456	9.57E-11	3.43E-10	13.72128662
KLK8	-1.250094869	5.934086619	-6.610917569	1.01E-10	3.61E-10	13.66824408
TYMP	-0.588129152	8.375722197	-6.608815125	1.02E-10	3.66E-10	13.65555114
ETV4	0.628318185	4.32030122	6.596956535	1.10E-10	3.93E-10	13.58402116
S100A7A	-1.477299025	4.594109481	-6.59595683	1.11E-10	3.95E-10	13.57799592
ALOXE3	-0.862301162	2.944235771	-6.594246294	1.12E-10	3.99E-10	13.56768827
TMEM255A	0.586024092	1.706605603	6.593901233	1.12E-10	4.00E-10	13.56560921
RIPPLY3	0.585652915	1.432335112	6.590093112	1.15E-10	4.10E-10	13.54267055
PSAT1	0.598234248	6.319275353	6.589013628	1.16E-10	4.12E-10	13.53617017
S100A14	-0.761922955	10.0970441	-6.552891359	1.45E-10	5.10E-10	13.31916369
RAC3	0.734943024	4.035873482	6.550093662	1.47E-10	5.18E-10	13.30239798
SULF1	0.975764866	5.536420263	6.533543643	1.63E-10	5.72E-10	13.20334147
SNHG18	0.674591651	3.238296299	6.532247822	1.64E-10	5.76E-10	13.19559447
SLC12A7	0.724325541	4.95220256	6.527496983	1.69E-10	5.92E-10	13.16720282
UGT8	0.880439532	1.835944999	6.527096315	1.69E-10	5.94E-10	13.16480917
RAB6B	0.650522808	1.93232022	6.52394511	1.73E-10	6.05E-10	13.14598766
HAL	-0.755207618	1.473614789	-6.523700615	1.73E-10	6.05E-10	13.14452766
BLNK	-0.665254524	4.398048429	-6.5229985	1.74E-10	6.08E-10	13.14033523
GCLC	0.627168761	5.102118605	6.514468814	1.83E-10	6.39E-10	13.08943353
STEAP1B	0.953915719	2.836650411	6.508343727	1.90E-10	6.63E-10	13.05291593
SERPINB4	-1.383131244	5.916847023	-6.501802014	1.98E-10	6.88E-10	13.01394621
PNLIPRP3	-1.237900742	3.376267581	-6.497279662	2.03E-10	7.07E-10	12.98702526
COL10A1	1.172777079	4.226210107	6.487949814	2.15E-10	7.46E-10	12.93153559
NKX3-1	0.596037505	2.679271369	6.484713496	2.20E-10	7.60E-10	12.91230307
SPOCK1	0.964315699	3.633346621	6.463372298	2.50E-10	8.61E-10	12.78568021
SV2A	0.590381085	1.937976889	6.463024304	2.51E-10	8.63E-10	12.78361837
PODXL2	1.039986719	3.411684171	6.460838034	2.54E-10	8.74E-10	12.77066705
ACER1	-0.693124675	1.547459369	-6.46056558	2.54E-10	8.75E-10	12.76905331
ALDH3B2	-0.956663662	6.263712698	-6.453244077	2.66E-10	9.13E-10	12.72570956
CST6	-1.086361107	5.526455826	-6.449060097	2.73E-10	9.36E-10	12.70095869
GSR	0.644463261	6.011897826	6.43650069	2.94E-10	1.01E-09	12.62674301
KCNS3	0.68329548	4.509510749	6.428150647	3.10E-10	1.06E-09	12.57746855
TNFRSF10D	0.601462426	2.996354313	6.411360219	3.43E-10	1.16E-09	12.47854959
EDIL3	0.830751271	3.668090281	6.409248753	3.47E-10	1.18E-09	12.46612555
LAMA1	0.672683159	1.854190437	6.406536201	3.53E-10	1.20E-09	12.45016973
SERPINB3	-1.338186756	7.29143312	-6.392173226	3.85E-10	1.30E-09	12.36577849
TRIM2	0.662522917	3.360915782	6.389432453	3.91E-10	1.32E-09	12.34969292
LCE2B	-1.051622006	1.806506042	-6.382087123	4.09E-10	1.38E-09	12.30661197
CERS3	-0.778410145	5.647771342	-6.3571938	4.75E-10	1.59E-09	12.16092182
ARSJ	0.665071189	3.82577018	6.335507949	5.41E-10	1.80E-09	12.0343959
ETNK2	0.687149829	3.184198825	6.333310634	5.48E-10	1.83E-09	12.02159608
SLC5A1	-0.856031675	2.595234827	-6.328891499	5.63E-10	1.87E-09	11.99586509
KLK10	-1.298642985	7.169961209	-6.29284355	6.98E-10	2.30E-09	11.78653935
ABCC5	0.664316328	4.834630081	6.27933443	7.57E-10	2.48E-09	11.70835478
CEACAM19	-0.591084081	3.930478933	-6.278961034	7.58E-10	2.49E-09	11.70619576
BHLHE41	0.673239235	3.439951876	6.27854904	7.60E-10	2.49E-09	11.70381369
ARNT2	0.718166745	2.012783636	6.267559979	8.12E-10	2.66E-09	11.64032598
TGFB2	0.602964726	2.857984741	6.262201329	8.38E-10	2.74E-09	11.60940141
CAPNS2	-0.983216827	6.115890308	-6.257885064	8.59E-10	2.81E-09	11.58450874
CDH2	0.689816166	1.899338656	6.255686626	8.71E-10	2.84E-09	11.57183556
GPC4	0.923098539	3.437640626	6.247112074	9.16E-10	2.98E-09	11.5224426
LIF	0.70140844	3.003919569	6.244768163	9.29E-10	3.02E-09	11.50895073
ZDHHC2	0.660354622	2.535476886	6.24227803	9.43E-10	3.06E-09	11.4946219
WNK2	0.751366276	1.93183607	6.232915771	9.96E-10	3.23E-09	11.44079266
GJB2	-0.989853744	10.39988136	-6.214461905	1.11E-09	3.59E-09	11.33489164
PLA2G4D	-0.692662131	1.7468172	-6.201218869	1.20E-09	3.87E-09	11.25905875
IGFL1	-1.428695214	5.767351913	-6.201116271	1.20E-09	3.87E-09	11.25847178
GEM	0.718528326	4.929398972	6.191710308	1.27E-09	4.08E-09	11.20469539
LY6D	-1.233926614	9.765563966	-6.182059273	1.34E-09	4.31E-09	11.1495902
SDC2	0.762874596	4.755436938	6.173883833	1.41E-09	4.51E-09	11.10296767
FN1	1.118739258	7.814353262	6.165821982	1.48E-09	4.72E-09	11.05704447
IL1F10	-0.603695008	1.741380172	-6.153580511	1.59E-09	5.06E-09	10.9874106
IQCG	0.653794558	3.171177575	6.143752481	1.68E-09	5.35E-09	10.9315908
CXCR2	-0.624239918	2.663484911	-6.14104069	1.71E-09	5.43E-09	10.91620218
RPP25	0.597586296	4.426163909	6.129397197	1.83E-09	5.79E-09	10.85019481
LOXL2	0.667023044	4.884958871	6.126675494	1.86E-09	5.88E-09	10.83478082
GPRC5B	0.593405917	2.558844769	6.115985552	1.98E-09	6.25E-09	10.7742965
FLG	-0.93894983	2.112191368	-6.113443764	2.01E-09	6.34E-09	10.75992821
KLK6	-1.396652957	5.908937916	-6.108761841	2.06E-09	6.50E-09	10.7334755
NIPAL4	-0.908989832	5.435247338	-6.0992775	2.18E-09	6.86E-09	10.67994246
BSPRY	-0.775755462	4.180460134	-6.097681588	2.20E-09	6.91E-09	10.67094155
ZIC2	0.700555066	3.074640805	6.090422551	2.30E-09	7.20E-09	10.63002624
MSRB3	0.596542371	3.235209795	6.085004101	2.37E-09	7.42E-09	10.59951255
KRT6A	-0.840449837	13.43784934	-6.073524191	2.53E-09	7.89E-09	10.53494103
ANXA1	-0.643139335	9.883745515	-6.067022549	2.63E-09	8.18E-09	10.49841736
RIBC2	0.659038477	2.447733236	6.066856017	2.63E-09	8.18E-09	10.49748229
VANGL2	0.587563553	5.102539014	6.064139845	2.67E-09	8.30E-09	10.4822342
SHISA2	0.924035975	3.636595988	6.060672768	2.73E-09	8.46E-09	10.46277918
COL4A1	0.636072523	7.666101826	6.039287581	3.09E-09	9.53E-09	10.34299038
FAT1	0.702510597	6.544749806	6.039143218	3.09E-09	9.54E-09	10.34218297
LOXL1	0.70079148	4.808897371	6.022911178	3.39E-09	1.04E-08	10.25150418
DACT1	0.772516958	2.570929335	6.018217188	3.48E-09	1.07E-08	10.22532075
ZNF185	-0.663717362	7.303014885	-6.017456593	3.50E-09	1.07E-08	10.22107974
SPRR2C	-1.450563964	5.919249242	-6.010783327	3.63E-09	1.12E-08	10.18389003
EGFR	0.655218961	6.19709261	6.009753326	3.66E-09	1.12E-08	10.17815306
CTHRC1	0.83817104	6.834361441	6.006851044	3.72E-09	1.14E-08	10.16199228
SERPINB1	-0.586684732	8.159223246	-6.000482186	3.86E-09	1.18E-08	10.12655211
PLA2G3	-0.869650733	3.024344504	-5.995107048	3.98E-09	1.21E-08	10.09666677
DUSP9	0.695917474	2.593938125	5.994267382	4.00E-09	1.22E-08	10.09200038
TUSC3	0.76165673	4.231589467	5.99340913	4.02E-09	1.23E-08	10.08723128
A2ML1	-1.137272351	5.821949183	-5.98980862	4.10E-09	1.25E-08	10.06723051
UPP1	-0.61657418	6.582398939	-5.96904567	4.62E-09	1.40E-08	9.952094759
PHGDH	0.791671849	4.637085227	5.954559431	5.01E-09	1.52E-08	9.871969093
SLFN13	0.622518289	2.578437084	5.954424469	5.02E-09	1.52E-08	9.871223389
PFN2	0.761434404	7.185868409	5.951851078	5.09E-09	1.54E-08	9.857007405
CRABP2	-0.789181134	8.700551536	-5.943721407	5.33E-09	1.61E-08	9.812132137
AKR1B10	-1.251242992	7.742264698	-5.935590915	5.58E-09	1.68E-08	9.767305294
ASPRV1	-1.314677641	4.525166173	-5.930370635	5.75E-09	1.73E-08	9.738551622
PLEKHG4	0.713522937	3.351514919	5.919256477	6.13E-09	1.84E-08	9.677406852
SERPINB13	-0.97510636	5.661157523	-5.914598396	6.29E-09	1.89E-08	9.651809803
PAPSS2	0.622865018	4.28161444	5.914560266	6.29E-09	1.89E-08	9.651600342
PLA2G2F	-0.607439232	1.654994481	-5.911130479	6.42E-09	1.92E-08	9.632764246
SLC2A10	0.613086081	3.197794101	5.905712246	6.62E-09	1.98E-08	9.603027023
ANKRD35	-0.730766345	3.534855014	-5.900720751	6.80E-09	2.03E-08	9.575652768
SPP1	1.142881167	6.476895014	5.883292614	7.51E-09	2.23E-08	9.480230802
PPL	-0.78902361	7.56957931	-5.871641943	8.02E-09	2.38E-08	9.416577718
KCNS1	0.717212968	1.808620383	5.865471002	8.30E-09	2.46E-08	9.382907259
CDH11	0.764387439	3.919653051	5.856202049	8.75E-09	2.58E-08	9.332390794
HSPG2	0.711473705	5.499833916	5.854826324	8.81E-09	2.60E-08	9.324898896
S100P	-1.131440073	6.234315871	-5.854063097	8.85E-09	2.61E-08	9.320743186
COCH	0.61451467	1.91466928	5.848837552	9.12E-09	2.69E-08	9.292303133
PLS1	0.664684349	3.120184544	5.847608354	9.18E-09	2.71E-08	9.285616418
PDGFC	0.596456402	4.404004486	5.846041626	9.26E-09	2.73E-08	9.277095339
KRT80	-0.863127144	5.966743948	-5.843889245	9.37E-09	2.76E-08	9.265392255
PTK6	-0.586659555	5.567039785	-5.835076297	9.85E-09	2.89E-08	9.217512856
OLFML2A	0.597296459	5.447936019	5.833142199	9.95E-09	2.92E-08	9.207013585
SYCP2	0.729405067	1.670920214	5.824060821	1.05E-08	3.07E-08	9.157755642
SBK1	0.604494516	1.819029571	5.818763257	1.08E-08	3.15E-08	9.129052113
GALNT5	0.676575464	2.388620691	5.793130437	1.24E-08	3.62E-08	8.99048771
UGT1A6	0.635613889	1.414719617	5.777808177	1.36E-08	3.92E-08	8.907913594
TPM1	0.633233003	5.340437304	5.77282394	1.39E-08	4.03E-08	8.881093763
FLG2	-0.822564752	1.511395591	-5.743156448	1.64E-08	4.72E-08	8.721872211
CYP2S1	0.776741117	5.723609568	5.736893663	1.70E-08	4.87E-08	8.688352064
TENM3	0.614099035	2.811552742	5.729233612	1.77E-08	5.07E-08	8.647396725
KLK13	-1.29086428	5.096619345	-5.689934285	2.20E-08	6.25E-08	8.438029645
RHOV	-0.636895555	6.953027377	-5.684311776	2.27E-08	6.44E-08	8.408178689
SMO	0.593816073	3.991128851	5.656645664	2.64E-08	7.44E-08	8.261670115
KLK5	-1.47009018	6.587872142	-5.642778859	2.85E-08	8.00E-08	8.188472499
CEL	0.864147572	2.069965088	5.589308278	3.81E-08	1.06E-07	7.90769642
SAMD12	0.620006332	2.426619257	5.584016805	3.92E-08	1.09E-07	7.880038274
CALML5	-1.335506982	7.452086886	-5.583152717	3.94E-08	1.09E-07	7.875523933
NTRK2	0.961296834	2.893284941	5.580187041	4.00E-08	1.11E-07	7.860034722
CARD18	-0.92176852	2.628768606	-5.57758953	4.06E-08	1.12E-07	7.846474318
RNASE7	-0.933762298	5.145302778	-5.570684365	4.21E-08	1.16E-07	7.810452613
PLA2G4F	-0.639622625	2.991138768	-5.562476633	4.40E-08	1.21E-07	7.767686914
KRT19	1.770657376	6.383662648	5.55980568	4.47E-08	1.23E-07	7.753782094
CIART	0.611137756	2.906855115	5.559645753	4.47E-08	1.23E-07	7.752949711
KLK11	-1.020288371	6.065602674	-5.544353176	4.86E-08	1.33E-07	7.673452584
KRT18	0.646519598	7.557801576	5.54015367	4.97E-08	1.36E-07	7.651655539
SLC7A2	0.64146002	2.243154453	5.533833392	5.14E-08	1.41E-07	7.618878276
SEZ6L2	0.695035237	3.710711132	5.526124597	5.35E-08	1.46E-07	7.57894469
DNASE1L3	-0.615924916	2.812182385	-5.518697423	5.57E-08	1.52E-07	7.540516347
PIR	0.588271787	5.041315779	5.502713738	6.07E-08	1.65E-07	7.457970928
TSPAN1	0.975188589	4.804491023	5.492692277	6.40E-08	1.74E-07	7.406324212
CREB3L1	0.684552861	3.463065732	5.484266695	6.70E-08	1.81E-07	7.362966299
VSTM2L	0.6789592	2.167679591	5.477675688	6.94E-08	1.88E-07	7.329090021
THBS1	0.764032222	6.193024773	5.474201433	7.07E-08	1.91E-07	7.311247615
GJB6	-1.043211822	8.63399952	-5.46762941	7.32E-08	1.98E-07	7.27752362
MAL	-1.392159939	4.535213082	-5.459212926	7.65E-08	2.06E-07	7.234387123
CYP2C18	-0.816729651	3.190549656	-5.45869491	7.67E-08	2.07E-07	7.231734086
ACTA2	0.608750157	6.083189753	5.446396291	8.19E-08	2.20E-07	7.168811576
LRRN1	0.658448131	1.858418266	5.443590276	8.31E-08	2.24E-07	7.154472945
IL36A	-1.081841311	2.729905653	-5.43927485	8.50E-08	2.28E-07	7.13243403
STAG3	0.664292783	1.489151664	5.437913605	8.56E-08	2.30E-07	7.125485348
SPRR3	-1.658300333	8.229246845	-5.437348092	8.59E-08	2.31E-07	7.122599054
ICAM1	0.626166156	5.969757103	5.435456393	8.68E-08	2.33E-07	7.112946029
DNER	0.585046391	1.899926039	5.422897546	9.27E-08	2.48E-07	7.048935668
SIM2	0.589551909	1.783145021	5.400867323	1.04E-07	2.77E-07	6.936967873
LAMA3	0.729624762	5.920910877	5.399025004	1.05E-07	2.80E-07	6.927622642
NID1	0.673117628	5.334958245	5.38221266	1.15E-07	3.05E-07	6.84247195
NRCAM	0.654567885	2.471646803	5.370483071	1.22E-07	3.23E-07	6.783203676
ZNF750	-0.726986735	6.4857873	-5.355974282	1.32E-07	3.48E-07	6.710051123
B4GALNT4	0.616899557	1.999660747	5.348027983	1.37E-07	3.62E-07	6.670060737
KRTCAP3	0.846951723	5.00116016	5.346843908	1.38E-07	3.64E-07	6.664106298
OVOL1	-0.599303825	5.21102451	-5.341078774	1.42E-07	3.75E-07	6.635131501
NPR3	0.632324255	2.152729042	5.330794097	1.50E-07	3.94E-07	6.583511026
TSPAN18	0.623003585	2.997605869	5.317333925	1.61E-07	4.22E-07	6.516085801
SERPINE2	0.70563658	5.161850463	5.29099448	1.85E-07	4.80E-07	6.384583841
KCNK7	-0.607668743	3.040115867	-5.287781399	1.88E-07	4.88E-07	6.368582023
SLAMF7	-0.602257965	4.136517102	-5.285047881	1.90E-07	4.94E-07	6.354975345
MFAP2	0.599157112	6.430052723	5.270679477	2.05E-07	5.30E-07	6.283556513
RASGEF1A	0.60153	2.565211157	5.245195895	2.34E-07	6.01E-07	6.157315362
GZMB	-0.750393147	4.850604156	-5.240335669	2.40E-07	6.16E-07	6.133300616
TMPRSS11E	-1.12793905	5.283990055	-5.211911771	2.77E-07	7.09E-07	5.993253882
ABCA13	0.621248683	2.043021607	5.20970899	2.80E-07	7.16E-07	5.98242901
ADAM12	0.678812208	3.92171752	5.206923795	2.84E-07	7.26E-07	5.968747893
RNF39	-0.588467862	4.264587961	-5.204245152	2.88E-07	7.36E-07	5.955596338
BEX2	0.842438794	3.582442555	5.20204644	2.91E-07	7.44E-07	5.944805659
ARHGEF26	0.617215527	2.130228145	5.201276355	2.93E-07	7.46E-07	5.941027256
SCNN1D	-0.609407138	2.555248247	-5.200444097	2.94E-07	7.49E-07	5.936944363
FOXC2	0.602068297	2.593359939	5.195666639	3.01E-07	7.67E-07	5.913518396
WFDC5	-0.83920281	5.233530694	-5.193922522	3.04E-07	7.73E-07	5.904971024
PANX2	0.608217919	2.819142237	5.181852427	3.23E-07	8.20E-07	5.845889579
STC1	0.620566387	4.06613334	5.180900063	3.25E-07	8.23E-07	5.841233119
FSTL1	0.588133639	6.479297925	5.174004206	3.36E-07	8.51E-07	5.807539579
RPTN	-1.086251065	2.959019593	-5.164744315	3.52E-07	8.91E-07	5.762358395
LAMC2	0.795815699	8.79117047	5.147611479	3.84E-07	9.68E-07	5.67895431
CD3D	-0.661010792	4.90104435	-5.131677169	4.16E-07	1.05E-06	5.601607555
IFI27	-0.637017112	9.638157575	-5.122054908	4.37E-07	1.09E-06	5.55500421
LCN2	-1.032101993	8.018969181	-5.074924359	5.53E-07	1.37E-06	5.327871384
FBN2	0.668397743	2.628739642	5.074654648	5.54E-07	1.37E-06	5.326577011
VTCN1	0.63892854	1.629794545	5.073042324	5.59E-07	1.39E-06	5.31884058
CD24	-0.601163322	9.021160591	-5.054862627	6.12E-07	1.51E-06	5.23176166
ARG1	-0.644756033	1.480416428	-5.043195139	6.48E-07	1.60E-06	5.176023672
PRR9	-1.193990695	3.558547664	-5.036615016	6.70E-07	1.65E-06	5.144640175
AGR2	0.914869807	3.744483288	5.029330658	6.94E-07	1.71E-06	5.109940877
ADAMTS12	0.591269953	3.14010801	5.021849253	7.21E-07	1.77E-06	5.074349997
RPL39L	0.786003295	5.026213566	5.020697762	7.25E-07	1.78E-06	5.06887631
KRT7	0.930509964	3.415184125	5.001623309	7.96E-07	1.94E-06	4.978369142
TAGLN	0.628963174	6.325538476	4.994345452	8.25E-07	2.01E-06	4.94391796
HS6ST2	0.682269126	3.376125707	4.99169285	8.36E-07	2.03E-06	4.931372589
IGF2BP2	0.593187563	5.292904405	4.975986094	9.03E-07	2.19E-06	4.85721129
CNN1	0.592305473	3.121386171	4.963719013	9.59E-07	2.32E-06	4.799437481
HAS2	0.648808983	3.446128761	4.962825534	9.64E-07	2.33E-06	4.795234528
RGS4	0.591723369	2.892995705	4.947503584	1.04E-06	2.51E-06	4.723265859
PXDN	0.652414034	5.212109567	4.943014674	1.06E-06	2.56E-06	4.702219088
KRT75	-1.109332314	5.359746851	-4.926880799	1.15E-06	2.76E-06	4.62671608
NGFR	0.657453043	3.928124247	4.925746399	1.16E-06	2.78E-06	4.621415731
FKBP10	0.645807069	4.929138863	4.925175879	1.16E-06	2.78E-06	4.618750463
DMRTA2	0.618450028	1.50058346	4.916103632	1.21E-06	2.90E-06	4.576405615
PGLYRP4	-0.71932928	3.911987552	-4.909177127	1.25E-06	3.00E-06	4.544123586
C19orf33	-0.616670977	8.688493267	-4.89203121	1.36E-06	3.25E-06	4.464389601
GDF15	0.641213639	2.539676125	4.87115618	1.50E-06	3.57E-06	4.36765504
IGFBP5	0.69915991	5.705692751	4.865741492	1.54E-06	3.66E-06	4.342624671
WFDC21P	-0.792186818	5.540127607	-4.8546214	1.63E-06	3.85E-06	4.291299171
PTX3	0.664158385	2.459502042	4.852845676	1.64E-06	3.88E-06	4.28311306
NKG7	-0.734311193	4.52716114	-4.851767497	1.65E-06	3.90E-06	4.278143967
PAQR5	-0.600056181	3.518066704	-4.850536596	1.66E-06	3.92E-06	4.272472234
CASP14	-1.151703644	3.712669412	-4.848327675	1.68E-06	3.96E-06	4.262297261
PRSS22	-0.606239565	5.569250578	-4.848265919	1.68E-06	3.96E-06	4.262012855
BBOX1	-0.657447616	3.314052914	-4.847340341	1.69E-06	3.98E-06	4.25775066
IL36G	-0.947771423	6.135454912	-4.830030566	1.83E-06	4.30E-06	4.178176799
NID2	0.58917723	3.932600662	4.829435977	1.84E-06	4.31E-06	4.175448035
MMP7	0.955532919	4.81359655	4.823145856	1.90E-06	4.44E-06	4.14659927
GPC3	0.799216708	2.752175756	4.818183262	1.94E-06	4.54E-06	4.12386311
ABCA12	-0.682748718	4.113425821	-4.816532483	1.96E-06	4.57E-06	4.116304766
NTS	1.288692442	2.429207363	4.810147386	2.02E-06	4.70E-06	4.087091765
ACKR3	0.592605248	6.412288164	4.805306878	2.06E-06	4.81E-06	4.064969002
APCDD1L	0.601038329	2.602903808	4.787090831	2.25E-06	5.21E-06	3.981896899
PTN	0.831273275	4.133942233	4.781309728	2.31E-06	5.36E-06	3.955592824
GZMH	-0.722944223	3.322349163	-4.774831027	2.39E-06	5.51E-06	3.926149024
COL8A1	0.604408345	3.375580581	4.702589936	3.35E-06	7.63E-06	3.600297658
KRT13	-1.587174379	8.394183387	-4.6822672	3.69E-06	8.35E-06	3.509446123
ANO1	0.743727473	6.297144744	4.653233923	4.22E-06	9.51E-06	3.38027801
CEACAM6	-0.885672519	6.018380608	-4.641518275	4.46E-06	1.00E-05	3.328363385
COL11A1	0.893071765	3.746894416	4.628259957	4.74E-06	1.06E-05	3.269757199
COL5A2	0.674190106	7.589062396	4.620963775	4.90E-06	1.10E-05	3.237571069
FOXA1	0.696738164	2.332341744	4.617193608	4.99E-06	1.11E-05	3.220957687
DHRS9	-0.659526425	3.568262514	-4.610493255	5.15E-06	1.15E-05	3.191462963
SOX2	0.816512576	4.793056548	4.595617774	5.51E-06	1.22E-05	3.126121796
FUT3	-0.609002879	3.892872212	-4.58278435	5.84E-06	1.30E-05	3.069905871
TFPI2	0.787227771	2.370687225	4.562494918	6.41E-06	1.41E-05	2.981323419
PSORS1C2	-0.777287501	2.614381255	-4.562236156	6.42E-06	1.42E-05	2.980196006
PTGS2	0.78862077	4.500084878	4.560308775	6.48E-06	1.43E-05	2.971800359
MDK	0.585284371	6.91713694	4.550313599	6.78E-06	1.49E-05	2.928313691
NT5E	0.629526979	4.852269811	4.547316394	6.87E-06	1.51E-05	2.915290614
SERPINB2	-0.84374234	6.086152191	-4.543665029	6.99E-06	1.53E-05	2.899435805
KANK4	0.622145231	2.159767157	4.537223661	7.20E-06	1.58E-05	2.871494863
POSTN	0.830917518	6.797901302	4.526715818	7.55E-06	1.65E-05	2.825992735
MMP11	0.749197227	4.971719257	4.506795377	8.26E-06	1.80E-05	2.739997237
CHI3L2	-0.605352949	3.009954419	-4.497077456	8.63E-06	1.87E-05	2.69817198
SOSTDC1	0.797494553	2.610696944	4.482710546	9.21E-06	1.99E-05	2.63648989
PRSS21	0.847129256	2.444753356	4.477655924	9.42E-06	2.04E-05	2.614831832
PHYHD1	0.620517999	2.54213228	4.468368028	9.82E-06	2.12E-05	2.575093643
CLCA4	-0.85756871	3.664571145	-4.451505451	1.06E-05	2.28E-05	2.503141382
COL5A1	0.664610484	7.250309884	4.450161932	1.07E-05	2.29E-05	2.497419392
ADH1C	0.622450037	1.383288531	4.427866779	1.18E-05	2.52E-05	2.402697564
PADI3	0.777669012	3.346542239	4.426081246	1.19E-05	2.54E-05	2.395130622
CLDN3	0.712232506	1.702089727	4.39720505	1.35E-05	2.88E-05	2.273146493
FAP	0.593438249	4.091950553	4.37287553	1.50E-05	3.19E-05	2.170941275
COL12A1	0.589447365	6.338640662	4.37274777	1.50E-05	3.19E-05	2.170405954
GZMA	-0.692569341	4.924164355	-4.345312342	1.70E-05	3.58E-05	2.055784787
VCAN	0.661694476	5.257044222	4.332446699	1.79E-05	3.78E-05	2.00226375
SERPINB7	-0.709181972	4.243525982	-4.308471461	1.99E-05	4.18E-05	1.902918597
FOXE1	0.585062525	4.903070226	4.284066946	2.21E-05	4.62E-05	1.802318928
BATF2	-0.640246047	3.569273475	-4.277556918	2.28E-05	4.74E-05	1.775572907
COL4A6	0.593851135	3.335802217	4.275468916	2.30E-05	4.78E-05	1.767002474
COL22A1	0.662311782	2.499878815	4.259965926	2.46E-05	5.09E-05	1.703490071
FGFBP2	0.732313316	1.71081048	4.239860702	2.68E-05	5.53E-05	1.621442035
OLFM1	0.641984195	3.077020234	4.238520995	2.69E-05	5.56E-05	1.615987584
MUC15	-0.646783946	3.1336763	-4.236884548	2.71E-05	5.59E-05	1.609327158
CXCL14	-0.834192929	8.958590838	-4.173103573	3.56E-05	7.26E-05	1.35159698
TMPRSS11B	-0.811042896	2.332615492	-4.166064399	3.67E-05	7.47E-05	1.32337535
CD8A	-0.597997466	3.548817394	-4.149421013	3.94E-05	7.98E-05	1.256824632
INHBA	0.655303871	5.751382774	4.108598038	4.67E-05	9.40E-05	1.094639494
SLITRK6	0.663983382	3.602593438	4.05476378	5.85E-05	0.000116502	0.883048739
POPDC3	0.600444054	3.41388651	4.04476597	6.09E-05	0.000121169	0.844040124
TNC	0.628575199	7.544415271	4.034384789	6.36E-05	0.00012624	0.803630935
SCNN1B	-0.599414253	2.992225719	-4.022484911	6.68E-05	0.00013235	0.757429553
ISG15	-0.596132976	9.651096233	-3.971197367	8.24E-05	0.000161393	0.559766426
UPK1B	0.869204236	2.289487531	3.916860937	0.000102594	0.000198658	0.352945597
OASL	-0.589045731	5.475090165	-3.890539095	0.000114006	0.000219666	0.253717916
PDLIM3	0.646340941	3.462978167	3.884164251	0.000116945	0.000224861	0.229780625
CWH43	-0.717972076	3.226028833	-3.844838651	0.000136723	0.000260324	0.082930244
SPRR4	-0.792668401	3.970318067	-3.832897315	0.000143329	0.000271987	0.03861681
CA2	-0.616412789	6.985978338	-3.80595601	0.000159357	0.00030068	-0.060883931
CD177	-0.715580667	3.079440776	-3.744831276	0.000202213	0.000376564	-0.284179924
AZGP1	-0.73833064	2.948365946	-3.715159554	0.000226733	0.000419645	-0.391344666
GBP5	-0.652732497	4.639180992	-3.67366041	0.000265755	0.000488112	-0.539875486
MUCL1	-0.74706628	2.831022732	-3.652288409	0.000288235	0.000526646	-0.615753259
GSTA1	0.759108958	2.121571694	3.616222712	0.000330269	0.000599083	-0.742848428
DKK1	0.66684553	3.958384499	3.597092309	0.000354837	0.000642056	-0.809778904
WFDC2	0.782437747	3.477943875	3.594438392	0.000358377	0.000647995	-0.819037445
CPA4	-0.585689006	4.445363161	-3.558851104	0.000409172	0.000734618	-0.942562414
CEACAM5	-0.730245415	4.406894849	-3.522880261	0.000467312	0.000833292	-1.066233422
DSC1	-0.736239784	3.44306646	-3.360198005	0.000840369	0.001446364	-1.610617469
CHGB	0.691276377	2.566809842	3.302978909	0.001027388	0.001752779	-1.796254983
IDO1	-0.659055368	4.565307518	-3.258030925	0.001200648	0.002030025	-1.939943622
KRT4	-0.977913617	4.965666081	-3.217535928	0.001379548	0.002313125	-2.067783537
ALDH1A1	0.631078735	4.190934629	3.194748	0.001490763	0.002487014	-2.139049986
CXCL11	-0.728561844	4.866726238	-3.169950797	0.00162116	0.00269151	-2.216048494
CDKN2A	0.672681634	3.936098775	3.169390207	0.001624227	0.00269609	-2.217782549
KLK14	-0.716677185	3.556674881	-3.154815966	0.001705841	0.002824887	-2.262761286
KRT24	-0.726179921	2.808770885	-3.141232992	0.001785295	0.002948398	-2.304501702
CXCL9	-0.661736179	6.512042569	-3.067558199	0.002278938	0.003702694	-2.52788966
MSLN	0.626095718	3.231985372	2.953575812	0.003293855	0.005237769	-2.863438494
CXCL10	-0.678671916	7.396250582	-2.921555995	0.003645499	0.00576042	-2.955496856
CST1	0.661710653	3.540725346	2.900719765	0.003892372	0.00612351	-3.014881721
CXCL17	-0.593335914	5.106368401	-2.841614971	0.004677794	0.007284729	-3.18110019
GPX2	0.610325983	6.027382963	2.610322954	0.009325792	0.013907495	-3.799671595
IGKC	-0.625558447	8.527888768	-2.590240315	0.009879762	0.014693123	-3.850976149
MMP13	0.689739269	5.586711396	2.561139892	0.010734684	0.015865717	-3.924634288
RPS4Y1	0.681481727	5.657967895	2.178838758	0.029824809	0.041140334	-4.816816891
