# Supplementary material for: Identification of Prognostic and Tumor Microenvironment by Shelterin Complex-Related Signatures in Oral Squamous Cell Carcinoma
Source: Oxid Med Cell Longev. 2022 Jun 15;2022:6849304. doi: 10.1155/2022/6849304 (PMC9217620; doi:10.1155/2022/6849304)
Supplement: Supplementary Materials — Supplementary Figure 1: immune infiltrating cells in high and low risk groups. ∗P < 0.05, ∗∗P < 0.01, and ∗∗∗P < 0.001. Supplementary file 1: 1329 DEGs between SGCluster A and SGCluster B. Supplementary file 2: result of univariate Cox analysis. [file 6849304.f1.zip › Supplementary file. 2.txt]

id	HR	HR.95L	HR.95H	pvalue
ATF2	1.212027695	1.007809786	1.457627376	0.041092143
DDX18	1.374511364	1.103969773	1.711352554	0.004448921
CENPI	1.271199918	1.054751177	1.532066774	0.011745961
DNAL1	1.299938762	1.039146772	1.626181048	0.021671207
TAF1A	1.276245063	1.055024505	1.543851781	0.012022988
TCEA1	1.264931524	1.008633982	1.586355198	0.041913161
NUBPL	1.665540078	1.301556805	2.131312087	5.02E-05
AZIN1	1.305199804	1.070957937	1.590675478	0.008309232
SNRNP40	1.278894775	1.009429598	1.620293134	0.041579143
CRCP	1.264208474	1.003621364	1.592456203	0.046518604
G2E3	1.326750951	1.082595305	1.625970552	0.006434139
ATP6V1C1	1.333142396	1.068043279	1.664041788	0.011025222
ANKRD40	1.431333552	1.132855949	1.808452115	0.002652359
ARL6IP6	1.246096966	1.038486428	1.49521227	0.017977233
KIF4A	1.165223711	1.004307895	1.351922357	0.043731472
ACTL6A	1.190878888	1.022589918	1.386863395	0.024618252
UXS1	1.199635976	1.001925122	1.436361305	0.047603066
HAUS2	1.275638344	1.022043429	1.592156593	0.031336414
PPIL4	1.356670119	1.078642836	1.706360762	0.009134887
TTK	1.17380537	1.005449754	1.37035097	0.042481688
BUB1	1.289228933	1.080624994	1.538101793	0.004787604
CDCA8	1.170305289	1.005051674	1.362730399	0.042883541
KIF23	1.230057585	1.0479081	1.443868658	0.011333156
C8orf33	1.471216646	1.162488603	1.861935174	0.001314053
HAT1	1.343861747	1.079480915	1.672993352	0.00818787
DHX33	1.297429717	1.034005038	1.627964863	0.024527897
CDK4	1.273931242	1.040706547	1.559422119	0.01894018
NFS1	1.30290059	1.058782215	1.603304177	0.01243476
DSG2	1.187708433	1.061678503	1.328699148	0.00264962
ODF2	1.400582779	1.111509336	1.764836388	0.004286126
COLGALT1	1.322918218	1.063801898	1.645148983	0.011867757
SPATS2	1.264554986	1.004696215	1.591624701	0.045512855
TATDN1	1.494464224	1.211432735	1.843621402	0.000176548
ACD	1.290530768	1.029750592	1.617352469	0.026793991
SLC25A32	1.364598304	1.107346	1.681613996	0.003537903
APEX1	1.282220753	1.025192158	1.603689657	0.02941055
PPAT	1.301019208	1.073746682	1.576396937	0.007223982
ARMC1	1.29153258	1.034198274	1.612898075	0.024034959
ARL6IP1	1.438316886	1.161653609	1.780871207	0.000853825
CDC6	1.186795866	1.02383044	1.375700869	0.023058181
PDIA4	1.24338056	1.024788725	1.508598971	0.027231489
TFAM	1.277438869	1.031035139	1.582729823	0.025123378
TRMT61B	1.385639042	1.109235387	1.730918051	0.004063081
EMC1	1.438697172	1.137093169	1.820298996	0.002443233
PTDSS1	1.388141075	1.137548495	1.69393714	0.001243571
POFUT2	1.269627522	1.038829099	1.55170282	0.019694939
TPX2	1.169910223	1.014327361	1.349357203	0.031134453
NUDCD1	1.405294325	1.159587544	1.703064292	0.000520473
HIBADH	1.318378253	1.087845595	1.597764634	0.004823758
CENPA	1.197460605	1.014666613	1.413185258	0.032986653
DARS2	1.270246989	1.05969882	1.5226283	0.009679641
DLGAP5	1.188927672	1.021760179	1.383444998	0.025194229
KNSTRN	1.411379434	1.170643287	1.701621603	0.000304818
CERS2	1.25225809	1.03097391	1.521037835	0.02336351
ANLN	1.207336524	1.056637522	1.379528412	0.005608246
TUBB	1.290031364	1.029168963	1.61701429	0.027146561
CKAP2L	1.185913851	1.029310142	1.366343927	0.018286767
INTS2	1.24521218	1.000627396	1.549581172	0.04934652
MTERF3	1.348931445	1.099601591	1.654795752	0.004097409
GEMIN2	1.4353406	1.166428499	1.766248542	0.000639242
MNAT1	1.564513991	1.273110983	1.922616379	2.08E-05
PRPS1	1.329410698	1.075597364	1.643117457	0.008434592
SMURF2	1.279764223	1.040996073	1.573297449	0.01921612
SENP2	1.230054523	1.025837635	1.47492554	0.025393798
ZNF639	1.217027607	1.022822805	1.448106347	0.026802631
NCBP2	1.339264785	1.095756316	1.636887818	0.004329661
CENPE	1.202035183	1.026059869	1.4081913	0.02269637
MTHFD1	1.212767785	1.007678685	1.459597907	0.041261525
LMAN2L	1.281960888	1.06751609	1.539483791	0.007825818
TMEM185B	1.246599229	1.034631544	1.501993291	0.020449572
HSP90AA1	1.509339523	1.22952768	1.852830021	8.32E-05
AURKA	1.32446703	1.115731206	1.572254054	0.00132052
ZNF281	1.245098246	1.045703588	1.482513458	0.013822403
FAM216A	1.265308987	1.060016114	1.510360844	0.009180978
GOLIM4	1.168785233	1.022144871	1.336463117	0.022596642
M6PR	1.219201695	1.030063166	1.443069534	0.021203302
BRIX1	1.236635434	1.01759576	1.502823869	0.032734369
ZDHHC4	1.289320396	1.059272593	1.56932889	0.011269901
CALU	1.178853327	1.015982421	1.367833871	0.030084462
MAD2L1	1.231380899	1.051669241	1.441802097	0.009713545
TMX1	1.351698256	1.101107325	1.659318881	0.003968924
PAICS	1.380884479	1.115600224	1.709252028	0.003026851
CYSRT1	0.924784036	0.864497435	0.989274784	0.022997389
SEMA4F	1.218892523	1.022934394	1.452389313	0.026860719
MMD	1.212346824	1.01450615	1.448768765	0.034140754
MZT1	1.23569439	1.052462906	1.450826073	0.009755401
TUBA1B	1.214045012	1.01854223	1.447073326	0.030384215
PRPF4	1.406054959	1.151616858	1.716708585	0.000819861
CEP55	1.187644281	1.021642089	1.380619448	0.025176054
PNPT1	1.252810531	1.033721661	1.5183335	0.02155448
GOPC	1.389542243	1.129563187	1.7093578	0.00185376
TIPIN	1.241960538	1.01503707	1.519615415	0.035295891
PHF3	1.262215488	1.041001237	1.530438083	0.017850807
HMMR	1.244734495	1.081763471	1.43225761	0.002230766
MED30	1.320769381	1.079513775	1.615942101	0.006862951
MTFR2	1.273126056	1.05287789	1.539447231	0.012715344
UBE2T	1.171731854	1.016630198	1.350496514	0.02869638
CDCA5	1.1808288	1.009256842	1.381567701	0.037987303
CCNB1IP1	1.264786075	1.056556834	1.51405373	0.010485809
NCAPG	1.196778439	1.008053744	1.420835587	0.04021082
PRR11	1.317017175	1.101128898	1.575232692	0.002573197
TMEM263	1.177774627	1.011249896	1.371721348	0.035395912
ASTE1	0.820841379	0.678611908	0.992880557	0.041996045
LAPTM4B	1.25869746	1.077921474	1.469791013	0.00363156
SPC25	1.254738403	1.070312621	1.470942628	0.005146702
CNFN	0.905683992	0.859278574	0.954595539	0.000222925
SHCBP1	1.238386383	1.034785512	1.482047067	0.019643337
DCBLD2	1.254372618	1.104313118	1.424822941	0.000489737
CCDC127	1.234069548	1.018614177	1.495097638	0.031685424
RACGAP1	1.213545784	1.011990478	1.455244297	0.036745078
CCNA2	1.22408663	1.049736955	1.427393853	0.009905374
AUNIP	1.280147302	1.062400616	1.542522745	0.009423719
NEIL3	1.192069459	1.026364116	1.384527745	0.021406351
ASPH	1.288461566	1.096651053	1.51382083	0.002057447
UBE2C	1.281824738	1.092208393	1.504360038	0.00236692
PLK1	1.309058847	1.116617509	1.534666123	0.000901388
BAG2	1.268477968	1.08548295	1.482323011	0.002772592
CCNB2	1.23069573	1.032818185	1.466484617	0.02028559
P4HA1	1.416295706	1.216627536	1.648732638	7.16E-06
TIA1	0.807495417	0.673377716	0.968325552	0.021038637
CMSS1	1.378189705	1.133020579	1.676409855	0.001329411
TMEM38B	1.198149677	1.023360339	1.40279293	0.024641224
AP2B1	1.261677518	1.056867347	1.506177822	0.010112565
SLC39A14	1.15806779	1.018351656	1.316952743	0.025273804
DIAPH3	1.264777256	1.055940224	1.514916725	0.010737515
YEATS2	1.201877873	1.013990763	1.424579467	0.033992858
SPTBN1	1.208430331	1.010210191	1.445544578	0.038350193
HSF2BP	1.271136689	1.053346563	1.53395714	0.012350506
DZIP1	1.23108774	1.052466816	1.440023573	0.009340886
BIRC5	1.250412863	1.063393862	1.470322881	0.006859904
GNA12	1.272548968	1.064496565	1.521264538	0.008140869
SPINK7	0.916254182	0.871572779	0.963226189	0.00060624
CKS1B	1.272441895	1.076662667	1.503821416	0.004705857
S100A9	0.91971116	0.857948371	0.985920186	0.018286812
SLC29A1	1.346496839	1.151177675	1.574955609	0.000198719
FKBP14	1.268657291	1.079715296	1.490662704	0.003826286
PDZK1IP1	0.915572233	0.852306016	0.983534667	0.015760649
LRP12	1.184625122	1.036530859	1.353878342	0.012899272
ERVMER34-1	1.129279696	1.007375667	1.265935514	0.036974086
CDKN3	1.252154078	1.077851414	1.454643761	0.003279679
KIF20A	1.170226946	1.019177296	1.343663275	0.025790016
SLURP1	0.951179994	0.90984654	0.994391187	0.027237323
IKBIP	1.345271462	1.117758298	1.619093598	0.001702998
LCE3D	0.949661538	0.909023549	0.992116252	0.020630807
CRCT1	0.940568499	0.896587698	0.986706713	0.012152766
PNMA1	1.411763414	1.176484685	1.694094248	0.00020948
RAI14	1.13525756	1.009657594	1.276481982	0.033953022
SLPI	0.927838495	0.86107506	0.999778432	0.049324034
LYPD5	0.907909731	0.827848213	0.995714029	0.04025176
SDR9C7	0.936633495	0.878593836	0.998507238	0.044884523
IGF1R	1.192086194	1.01996451	1.393253863	0.027214677
SCCPDH	1.20326144	1.064680442	1.359880426	0.003037871
C10orf99	0.936575653	0.886591548	0.989377753	0.019201836
LYNX1	0.881991006	0.816288301	0.952982094	0.00147656
MXRA7	1.249603404	1.059873118	1.473297738	0.008000516
TPST1	1.177744839	1.033881046	1.341627173	0.013846257
HMGB3	1.182113831	1.008864608	1.38511461	0.038535504
CMBL	1.133723143	1.002808407	1.28172855	0.044988644
PGAP1	0.817561654	0.691201853	0.967021509	0.018700949
FZD6	1.153978845	1.002353515	1.328540435	0.0462974
AURKB	1.166011111	1.008794213	1.347729689	0.037667725
PITPNA-AS1	1.201176371	1.027354279	1.404408104	0.021542397
PEG10	1.104266438	1.024522597	1.19021715	0.009501499
ADAM17	1.208160272	1.041407399	1.401614052	0.012582539
LYPD3	0.891190993	0.814522797	0.975075699	0.012076691
IVD	1.173140689	1.019744255	1.349611994	0.025520866
LARP6	1.194207272	1.042414434	1.368103665	0.010501517
PRSS27	0.890831185	0.823906096	0.963192534	0.003718357
MYZAP	0.832145642	0.712119296	0.9724022	0.020771576
NETO2	1.170026329	1.000471463	1.368316499	0.049314207
ENDOU	0.897237084	0.828635598	0.971517985	0.007540335
PTPRK	1.192793485	1.016948514	1.399044571	0.030273301
TK1	1.169162873	1.00601086	1.358774421	0.041538376
ETV5	1.150517129	1.011794423	1.308259497	0.0324497
SGCB	1.225886782	1.040245835	1.444656977	0.015060551
KRT78	0.903728239	0.849924297	0.960938208	0.001228168
CCNB1	1.175943247	1.006558789	1.373831847	0.041117301
WFDC12	0.945677189	0.899609506	0.994103931	0.028376191
MYO10	1.160865263	1.002638501	1.34406185	0.046020028
KIF3C	1.22122645	1.056246758	1.411975024	0.006955724
KDELR3	1.132241459	1.011208031	1.267761611	0.031303574
ALDH1B1	1.205027717	1.067244818	1.360598593	0.002608402
PLOD2	1.211503233	1.079905909	1.359137005	0.001074428
ADORA2B	1.308603006	1.124537724	1.522796248	0.000506057
DEFB1	0.92601358	0.871141478	0.984342006	0.013650058
SNAPC1	1.339714233	1.148273962	1.563071432	0.000201314
IRS2	1.163955688	1.02810737	1.317754239	0.016496795
TGM5	0.889411179	0.805111026	0.982538085	0.021071954
ITGB1	1.155813026	1.01950142	1.310350064	0.023721258
IVL	0.938529235	0.884658104	0.99568084	0.035423677
FGFR2	0.840269298	0.734395253	0.961406668	0.011317198
LGALSL	0.883782612	0.789177151	0.989729244	0.032461506
CSTA	0.860625083	0.79239426	0.934731068	0.000368677
SPINK5	0.888726844	0.837290335	0.943323206	0.000105281
ASNS	1.262697731	1.097150851	1.453223646	0.001141761
SGCE	1.166984973	1.058673926	1.286377131	0.001888463
RHPN2	1.203259042	1.058328413	1.368036902	0.004717683
EPS8L1	0.857088649	0.763082402	0.962675788	0.009276208
NUDT11	1.117260277	1.021781499	1.22166092	0.014985654
PLOD3	1.183914856	1.01950443	1.374838936	0.026884486
MND1	1.16588398	1.003069677	1.355125657	0.045510861
SPRR2B	0.936570547	0.896045411	0.978928498	0.003688951
GDPD3	0.881030791	0.798242105	0.972405802	0.011878441
ALOX12B	0.93357968	0.879764161	0.990687115	0.023278343
S100A12	0.940717769	0.887762307	0.996832049	0.038705944
STEAP3	1.195282112	1.028990518	1.388447516	0.019602631
ACSL4	1.197965409	1.02775361	1.396366899	0.020883752
PSPH	1.197002501	1.050916688	1.363395409	0.006772969
CKS2	1.315827266	1.12705942	1.53621128	0.000512993
TXNRD1	1.131289883	1.00974546	1.267464772	0.033403322
SPRR1A	0.930790582	0.886990238	0.976753826	0.003541187
IL36RN	0.912489489	0.858772484	0.969566541	0.003092846
PDGFA	1.30202433	1.125171187	1.50667505	0.000395098
VSIG10L	0.902578605	0.834752134	0.97591621	0.010123169
B4GALNT1	1.216800943	1.059587173	1.39734094	0.00543675
TGM3	0.948438787	0.911167763	0.987234369	0.009651298
HOPX	0.854518941	0.778617794	0.937819076	0.00092411
ANKRD22	0.853561195	0.772117228	0.943595982	0.001970272
EVPL	0.890770776	0.799100444	0.992957245	0.036841373
KLK12	0.9216731	0.871694457	0.97451727	0.004138225
LDHB	1.221504573	1.056659961	1.412065827	0.006828846
CRNN	0.952829042	0.916119413	0.991009656	0.015931308
KRT8	1.070798737	1.008561117	1.136876997	0.025156635
S1PR3	1.178167426	1.033186499	1.343492664	0.014394606
FERMT2	1.15411415	1.024158791	1.300559526	0.018692015
GPX8	1.159813382	1.017216588	1.322399868	0.026760706
BCAT1	1.102174016	1.003188018	1.210927104	0.042738261
MATN3	1.131477448	1.006571739	1.271882733	0.038478868
COL9A2	0.890571546	0.798646665	0.993077055	0.037074398
SPINK6	0.931276187	0.885456591	0.979466803	0.005675975
PLAC1	1.103594624	1.001985619	1.21550756	0.045476969
EVA1A	1.124434282	1.030405402	1.227043697	0.008483213
CTNNAL1	1.170994138	1.044484099	1.31282733	0.006808225
CDR2L	1.164340865	1.017191621	1.332777051	0.027297695
CALML3	0.900869757	0.82401408	0.984893753	0.021760506
SLC6A14	0.920493362	0.857967218	0.987576228	0.020982964
GLTP	0.863494	0.760518094	0.98041308	0.023495778
HMGA2	1.175846052	1.076608833	1.284230536	0.000317219
SCEL	0.911654519	0.851568638	0.975980003	0.00784003
TMPRSS11D	0.900944228	0.850890965	0.95394185	0.000347826
RHCG	0.944978777	0.901008939	0.991094372	0.019915472
BNIPL	0.880249426	0.803816879	0.963949715	0.005919536
CDK6	1.208841871	1.068795809	1.367238398	0.002535954
SPNS2	0.854086174	0.766405823	0.951797561	0.004319047
RASAL1	0.87349493	0.768819129	0.992422489	0.037824011
TMPRSS13	0.864644999	0.77385584	0.966085589	0.010182837
STC2	1.227929856	1.10179961	1.368499061	0.000204773
VEGFA	1.176355695	1.030996596	1.342208817	0.015796718
PPFIA1	1.150323645	1.041972041	1.269942413	0.005528056
FBXO32	1.113098706	1.000755699	1.238053133	0.048395361
SERPINH1	1.215588995	1.067142559	1.384685291	0.003304684
S100A7A	0.944920528	0.895942167	0.996576384	0.036955799
BLNK	0.858492639	0.772746931	0.95375288	0.00448421
SPOCK1	1.138361667	1.05665582	1.226385414	0.000649261
ACER1	0.878326218	0.779521933	0.989653932	0.033108075
LAMA1	1.143842144	1.027552603	1.273292333	0.014016523
LCE2B	0.911491739	0.842356462	0.9863012	0.021295735
ARSJ	1.189894892	1.059939999	1.335783021	0.00321406
SLC5A1	0.913807561	0.835452409	0.999511461	0.048764195
ARNT2	0.878024529	0.783117717	0.984433191	0.025828496
CAPNS2	0.919047025	0.853112473	0.990077465	0.026249342
GPC4	1.091487847	1.01219966	1.176986879	0.022899975
LIF	1.205103113	1.090721357	1.331479854	0.000245738
FN1	1.074282946	1.006747375	1.146349001	0.03054434
BSPRY	0.884716661	0.809533334	0.966882448	0.006867087
DACT1	1.097831034	1.005213947	1.198981553	0.037930019
PLA2G3	0.891791784	0.820862726	0.968849675	0.006761664
DUSP9	1.119657539	1.018116042	1.231326246	0.01980056
A2ML1	0.903873843	0.85025793	0.96087069	0.001198141
PFN2	1.123479421	1.02012242	1.237308371	0.018051017
ASPRV1	0.943593666	0.892962877	0.997095209	0.039079789
PLEKHG4	0.900757655	0.815949985	0.994380009	0.038296037
SERPINB13	0.918885979	0.85611422	0.986260271	0.01911987
PLA2G2F	0.878824601	0.77786251	0.992890991	0.038028567
SPP1	1.079712982	1.017928982	1.14524701	0.010740383
PPL	0.916376376	0.84003887	0.99965096	0.049087538
PDGFC	1.14446636	1.018768285	1.285673364	0.023013585
KRT80	0.896924653	0.827262215	0.972453254	0.008361311
SYCP2	0.883721601	0.793060651	0.984746711	0.025202404
TPM1	1.144229678	1.030109285	1.27099287	0.01195917
CALML5	0.905266226	0.861949304	0.950760023	6.94E-05
KRT18	1.176785636	1.057975106	1.308938579	0.002719315
THBS1	1.208730731	1.104702989	1.322554564	3.65E-05
MAL	0.942989238	0.897300159	0.991004732	0.020527675
CYP2C18	0.89487512	0.826845799	0.968501601	0.005899084
IL36A	0.890113476	0.83183955	0.952469741	0.000752828
STAG3	0.836734181	0.739064697	0.947310964	0.004882521
SPRR3	0.933228706	0.897872452	0.969977211	0.000453412
SIM2	0.875778877	0.778590712	0.985098627	0.027096504
LAMA3	1.134436712	1.033150641	1.245652476	0.008206977
SLAMF7	0.897730088	0.809554973	0.995509061	0.040825806
MFAP2	1.129961873	1.0131348	1.260260565	0.028212557
GZMB	0.913519969	0.84038364	0.993021156	0.033632118
ABCA13	0.895765523	0.806869002	0.994456188	0.038997462
FOXC2	1.123177784	1.017026201	1.240408883	0.021832745
STC1	1.231295819	1.11554838	1.359053018	3.61E-05
RPTN	0.924165731	0.871890561	0.979575118	0.007940416
LAMC2	1.121794249	1.033174896	1.218014822	0.006195246
CD3D	0.85198558	0.776386508	0.93494596	0.000727944
CD24	0.897458004	0.815934223	0.987127204	0.025972909
RPL39L	1.087570976	1.00599288	1.175764412	0.034844879
IGF2BP2	1.200968974	1.07457883	1.342224913	0.001247673
HAS2	1.103596157	1.009268374	1.206739959	0.030591943
DMRTA2	0.901185715	0.812795722	0.999187953	0.04822415
PGLYRP4	0.898304993	0.829220885	0.973144643	0.00862143
GDF15	1.093062283	1.005755993	1.187947338	0.036162134
WFDC21P	0.877271669	0.811882377	0.947927437	0.000922764
PTX3	1.146719628	1.058476752	1.242319117	0.000805208
NKG7	0.919681538	0.849285825	0.995912221	0.039323827
APCDD1L	1.152810535	1.051407749	1.263993091	0.002469245
KRT13	0.954048827	0.920673557	0.988633981	0.009621577
ANO1	1.133214669	1.050291008	1.222685404	0.001257497
CEACAM6	0.917279256	0.862468358	0.975573452	0.006021006
COL11A1	1.065210254	1.005312425	1.128676874	0.032403354
FUT3	0.903585599	0.82578403	0.988717274	0.027316457
TFPI2	1.116439763	1.045225326	1.192506259	0.001055658
NT5E	1.167003303	1.065951988	1.277634195	0.000831529
SERPINB2	0.931159576	0.870544101	0.99599567	0.037820565
CLCA4	0.892166309	0.832365609	0.956263347	0.001267091
PADI3	1.080954331	1.011569033	1.155098888	0.021460032
FAP	1.106390217	1.012428272	1.209072629	0.02556632
SERPINB7	0.908104911	0.842456162	0.978869366	0.011809012
COL4A6	1.11572638	1.023763845	1.215949715	0.012592494
MUC15	0.877032728	0.809208961	0.950541137	0.001397563
TMPRSS11B	0.918205521	0.857620872	0.983070032	0.01427586
CD8A	0.911504506	0.837612766	0.991914759	0.031700126
INHBA	1.159986376	1.071208185	1.256122208	0.000258954
SLITRK6	1.081915311	1.007831891	1.161444434	0.029590423
POPDC3	1.152656593	1.060309683	1.25304639	0.000854813
SCNN1B	0.897759635	0.827531053	0.973948178	0.009455645
SPRR4	0.938424228	0.883982627	0.996218709	0.037141502
CD177	0.895490874	0.833115125	0.962536728	0.002731068
DKK1	1.153021793	1.080513499	1.230395785	1.73E-05
CEACAM5	0.916968755	0.865046117	0.972007944	0.003561517
CHGB	1.114759476	1.054776053	1.17815406	0.000118261
IDO1	0.935863839	0.880470748	0.994741878	0.033227859
CDKN2A	0.931584607	0.879585771	0.986657481	0.015591777
KRT24	0.939540948	0.887594917	0.994527094	0.031628046
CXCL17	0.93947136	0.885968177	0.996205574	0.036884803
IGKC	0.924289871	0.878117402	0.972890144	0.002602707
