# Supplementary figures and images for: Identification of Prognostic and Tumor Microenvironment by Shelterin Complex‐Related Signatures in Oral Squamous Cell Carcinoma
Source: Hindawi journal article supplement (doi:10.1155/2022/6849304), 2022-01-01

risk low high

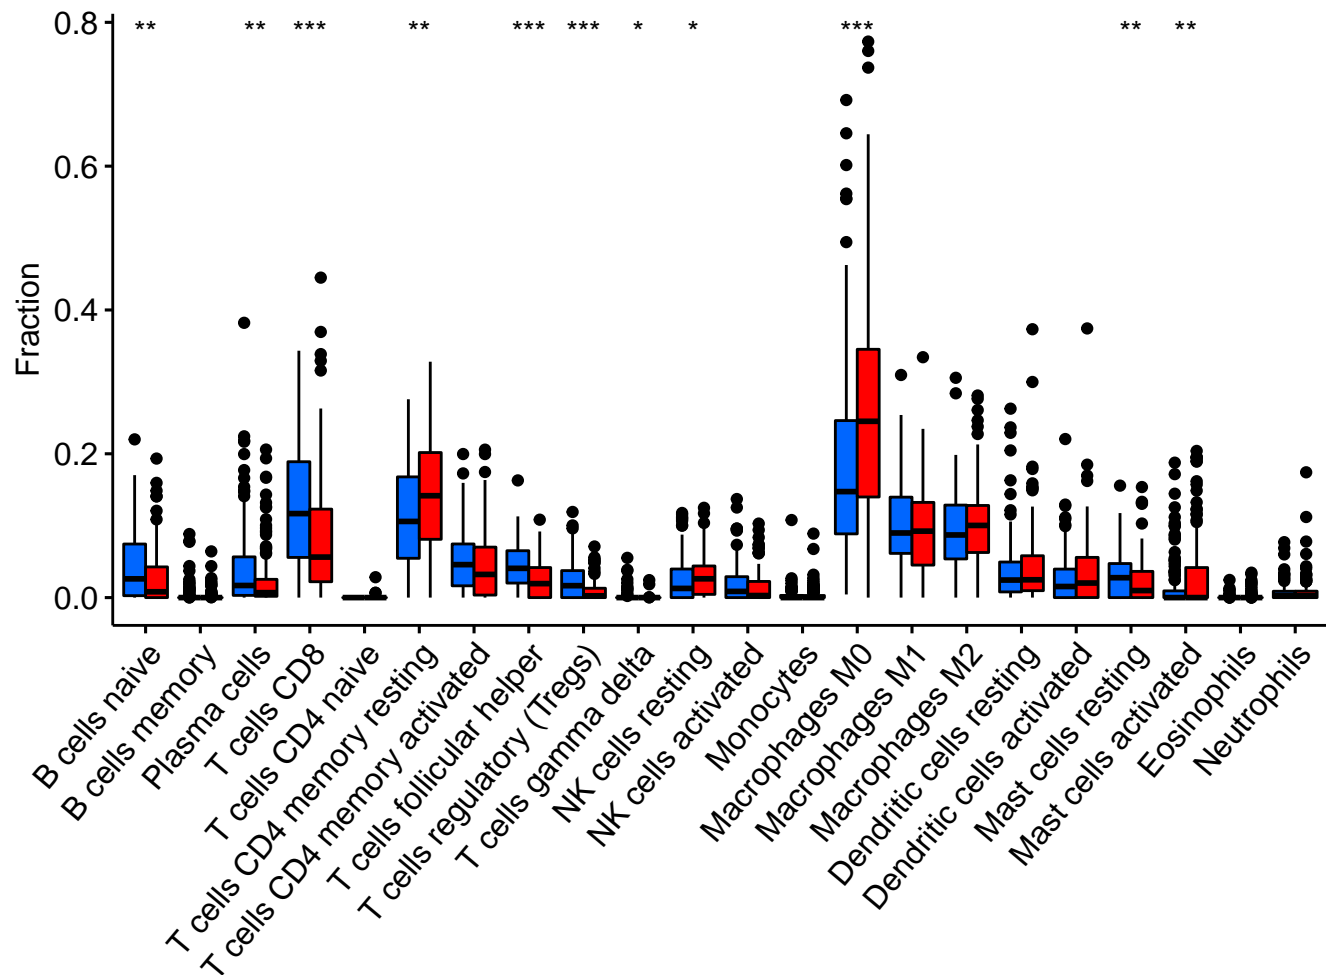

Supplement: f1 [file 6849304.f1.zip]
